# Supplementary material for: Rational Design of Novel Inhibitors of α-Glucosidase: An Application of Quantitative Structure Activity Relationship and Structure-Based Virtual Screening
Source: MDPI journal article supplement (doi:10.3390/ph14050482), 2021-05-19
Supplement: s1 [file s1]

# Rational Design of Novel Inhibitors of $\alpha$ -Glucosidase: An Application of Quantitative Structure Activity Relationship and Structure-Based Virtual Screening

Sobia Ahsan Halim <sup>1</sup>, Sumaira Jabeen <sup>2</sup>, Ajmal Khan <sup>1,\*</sup> and Ahmed Al-Harrasi <sup>1,\*</sup>

<sup>1</sup> Natural and Medical Sciences Research Center, University of Nizwa, P.O Box 33, 616 Birkat Al Mauz, Nizwa, Oman; sobia\_halim@unizwa.edu.om

<sup>2</sup> Department of Chemistry, Government Post-Graduate College for Women, Shadbagh, Lahore 54950, Pakistan; sumairabhathi23@gmail.com

\* Correspondence: ajmalchemist@yahoo.com (A.K.); aharrasi@unizwa.edu.om (A.A.-H.); Tel.: +96825446328 (A.A.-H.)

## Contents:

- Procedure of Homology Modeling
- Figure S1. The sequence alignment of *S. cerevisiae*  $\alpha$ -glucosidase model and templates
- Calculation of Enrichment Factor (EF) and Receiver operating characteristic-curve (ROC-curve)
- Figure S2. Receiver Operating Curve (ROC) for  $\alpha$ -glucosidase obtained from MOE which showed AUC value of 0.93.
- Figure S3. The correlation between Actual activities (pIC<sub>50</sub>) of known inhibitors (compounds used in QSAR modeling) with their docking scores
- Table S1. ADMET Properties of Selected 142 Hits
- Table S2. QSAR Predicted pIC<sub>50</sub> values, docking scores, docking ranks and protein-ligand interactions of 142 Hits
- Table S3. 3D-structures of selected hits
- Table S4. The predicted activities of thirty-two compounds (Test set 2)
- Figure S4. The correlation between Actual activities (pIC<sub>50</sub>) and Predicted activities (\$PRED) of Test set 2 compounds



## Procedure of Homology Modeling

The homology model of *Saccharomyces cerevisiae* was generated by SwissModel server (swissmodel.expasy.org). FASTA sequence of *S. cerevisiae*  $\alpha$ -glucosidase was taken from UniProtKB (AC: P53341, www.uniprot.org). *S. cerevisiae* isomaltase (PDB ID: 3AXH, Resolution 1.30Å, 72.4 % identity with *S. cerevisiae*  $\alpha$ -glucosidase) was used as template. PROCHECK Ramachandran plot [<https://servicesn.mbi.ucla.edu/PROCHECK/>], ERRAT plot [<https://servicesn.mbi.ucla.edu/ERRAT/>] and Verify3D [<https://servicesn.mbi.ucla.edu/Verify3D/>] were used for structural and physicochemical assessment of model. UCSF Chimera [<https://www.cgl.ucsf.edu/chimera/>] was used for the visual analysis. Active site residues, catalytic triad and water molecules involve in protein-ligand bridging were identified by superimposing template structure on the model and sequence alignment. Finally, the model was used in the structure-based screening of 6609 compounds.



|        |                                                                             |
|--------|-----------------------------------------------------------------------------|
| P53341 | MTIS-DHPETEFKWWKEATFYQIYPASFKDSNDDGWGLDGLGITSKLQYIKDLGVDAIWVCPFYDSPQDDMGY   |
| 3AXH   | MTISSAHPETEPKWWKEATFYQIYPASFKDSNDDGWGLDGLGITSKLQYIKDLGVDAIWVCPFYDSPQDDMGY   |
| 3A47   | MTISSAHPETEPKWWKEATFYQIYPASFKDSNDDGWGLDGLGITSKLQYIKDLGVDAIWVCPFYDSPQDDMGY   |
| cons   | **** *****:*****:*****:***:***:***:*. *****:*****:****                      |
| P53341 | DISNYEKVWPTYGTNEDCFELIDKTHKLGKMFITDLVINHCSTEHEWFKESRSSKTNPKRDWFFWRPPKGYD    |
| 3AXH   | DIANYEKVWPTYGTNEDCFALIEKTHKLGKMFITDLVINHCSEHEWFKESRSSKTNPKRDWFFWRPPKGYD     |
| 3A47   | DIANYEKVWPTYGTNEDCFALIEKTHKLGKMFITDLVINHCSEHEWFKESRSSKTNPKRDWFFWRPPKGYD     |
| cons   | **:* ***** **:* *****:*****:*****:*****:*****:*****:*****:*****             |
| P53341 | AEGKPIPPNNWKSFFGGSAWTFDETTNEFYLRLLFASRQVDLNWENEDCRAIFESAVGFWLHDHGVGDGFRIDT  |
| 3AXH   | AEGKPIPPNNWKSFFGGSAWTFDEKTQEFYLRLLFCSTQPDNLWENEDCRKAIYESAVGYWLHDHGVGDGFRIDV |
| 3A47   | AEGKPIPPNNWKSFFGGSAWTFDEKTQEFYLRLLFCSTQPDNLWENEDCRKAIYESAVGYWLHDHGVGDGFRIDV |
| cons   | *****:*****:*.*****.* * *****:*.*****:*****:*****:*****                     |
| P53341 | AGLYSKRPLPDSPIFDKTSKLQHPNWGSHNGPRIHEYHQELHRFMKNRVKDGREIMTVGEVAHGSDNA--L     |
| 3AXH   | GSLYSKVVGLPADPVVDKNSTWQSSDPYTLNGPRIHEFHQEMNQFIRNRVKDGREIMTVGAMQHASDETKRL    |
| 3A47   | GSLYSKVVGLPADPVVDKNSTWQSSDPYTLNGPRIHEFHQEMNQFIRNRVKDGREIMTVGEMQHASDETKRL    |
| cons   | ..**** *:*.**.* * .: *****:*****:*****:*****:*****:*****:*****:*****        |
| P53341 | YTSARYEVSEVFSFTHVEVGTSPFFRYNIVPFTLKQWKEAIASNFLFINGTDSWATTYIENHDQARSITRF     |
| 3AXH   | YTSASRHELSELFNFSHTDVGTSPFLFRYNLVPFELKDWKIALAELFRYINGTDCWSTIYLENHDQPRISITRF  |
| 3A47   | YTSASRHELSELFNFSHTDVGTSPFLFRYNLVPFELKDWKIALAELFRYINGTDCWSTIYLENHDQPRISITRF  |
| cons   | ****:*.*:*.*:*.*:*.:*****:*****:*** **:* * *.* * :*****:*. * *:*****:*****  |
| P53341 | ADDSPKYRKISGKLLTLECSLTGTLYVYQGQELGQINFKEWPIEKYEDVDVKNNYEIIKKSFGKNSKEMKD     |
| 3AXH   | GDDSPKNRVISGKLLSVLLSALTGTLYVYQGQELGQINFKNWPVEKYEDVEIRNNYNAIKEEHGENSEEMKK    |
| 3A47   | GDDSPKNRVISGKLLSVLLSALTGTLYVYQGQELGQINFKNWPVEKYEDVEIRNNYNAIKEEHGENSEEMKK    |
| cons   | .***** * *****:*. :*****:*****:*****:***:*****:***:*****:*****:*****        |
| P53341 | FFKGIALLSRDHSRTPMPWTKDKPNAGFTGPDVKPWFLNLNESFEQGINVEQESRDDSVLNFWKRALQARKK    |
| 3AXH   | FLEAIALISRDHARTPMQWSREEPNAGFSGPSAKPWFYLNDSFREGINVEDEIKDPSVLNFWKEALKFRKA     |
| 3A47   | FLEAIALISRDHARTPMQWSREEPNAGFSGPSAKPWFYLNDSFREGINVEDEIKDPSVLNFWKEALKFRKA     |
| cons   | *:*.***:***:*** *:***:*****:***.***** **:* *:*****:*. * :*****:***: **      |
| P53341 | YKELMIYGYDFQFIDLDSQIFSFTKEYEDKTLFAALNFSGEEIEFSLPREGASLSFILGNYD--DTDVSSR     |
| 3AXH   | HKDITVYGYDFEFIDLNNKLLFSFTKKYNNKTLFAALNFSSTATDFKIPNDSSFKLEFGNYPKKEVDASSR     |
| 3A47   | HKDITVYGYDFEFIDLNNKLLFSFTKKYNNKTLFAALNFSSTATDFKIPNDSSFKLEFGNYPKKEVDASSR     |
| cons   | :*:* :*****:*****:..:*****:*.:*****:*****: :*.*:..:*.: :*** :*.*****        |
| P53341 | VLKPWEGRIYLVK                                                               |
| 3AXH   | TLKPWEGRIYISE                                                               |
| 3A47   | TLKPWEGRIYISE                                                               |
| cons   | .*****: :                                                                   |



## Calculation of Enrichment Factor (EF) and Receiver operating characteristic-curve (ROC-curve)

EF was calculated by following equation:

$$EF = \frac{\text{HITS sampled/HITS total}}{N \text{ sampled}/N \text{ total}}$$

%EF was calculated by following equation:

$$\%EF = \frac{\text{Enrichment Factor} \times 100}{\text{Ideal Enrichment Factor}}$$

Success was declared when 50% of known  $\alpha$ -glucosidase inhibitors ( $\alpha$ GIs) were ranked in the top 1% (top 67 compounds), 5% (top 333 compounds) and 10% (top 665 compounds) of screened library. The optimal threshold for virtual screening accuracy was justified by the following criteria: If in top 1%, in top 5% and in top 10% of screened database, all the 38  $\alpha$ GIs are successfully identified then, the ideal EF would be 100, 20 and 10, respectively.

ROC curves differentiate between two populations (active inhibitors and decoy compounds), therefore it is used to evaluate VS performance. ROC curve describes the trade-off between sensitivity (detection of true positives by model) and specificity (ability of model to avoid false negatives). Enrichment is quantified by calculating area under the curve (AUC). If the value of AUC is  $\geq 0.9$ , the scoring function would be considered as excellent, while the value of AUC  $\leq 0.6$  depicts least or no enrichment. The AUC value of 0.93 was observed for MOE, indicating that MOE is performing well in virtual screening. The ROC curve of MOE is shown in Figure S2.



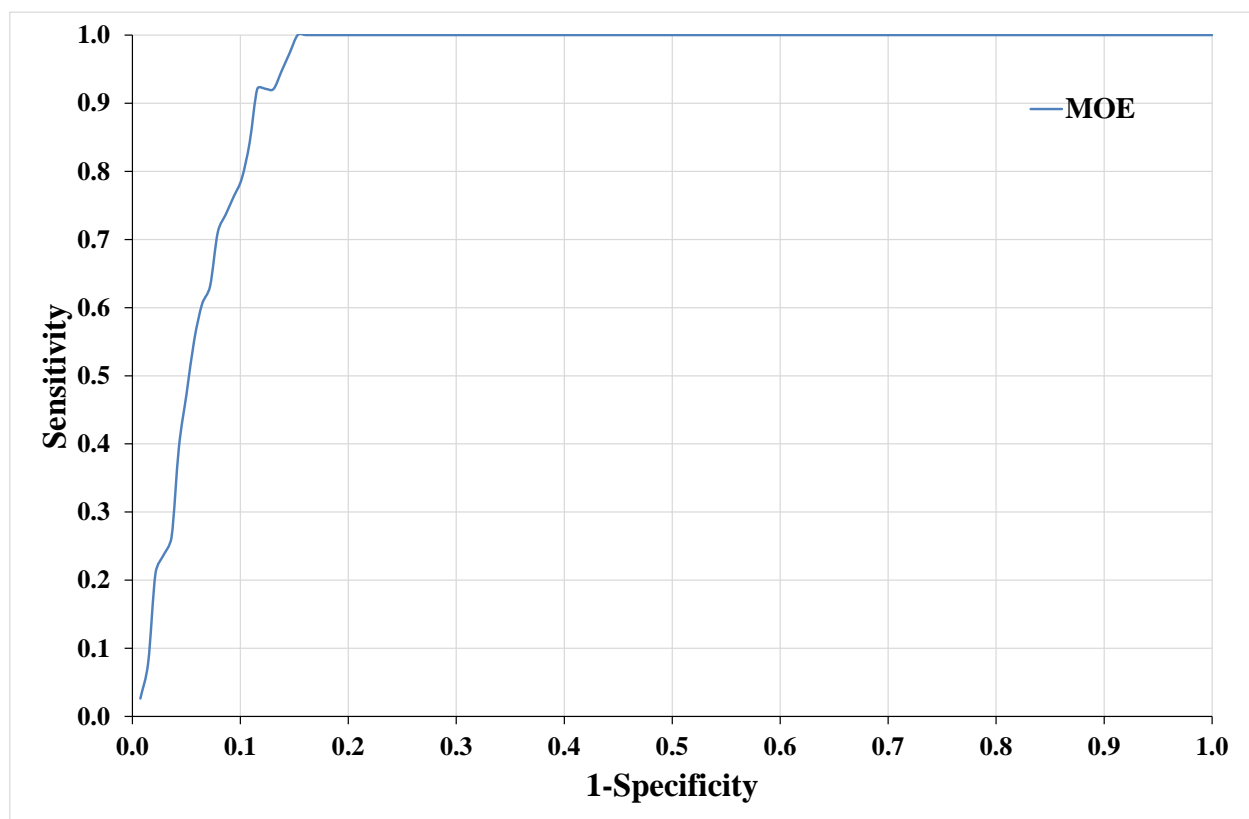

**Figure S2. Receiver Operating Curve (ROC) for  $\alpha$ -glucosidase obtained from MOE which showed AUC value of 0.94.**



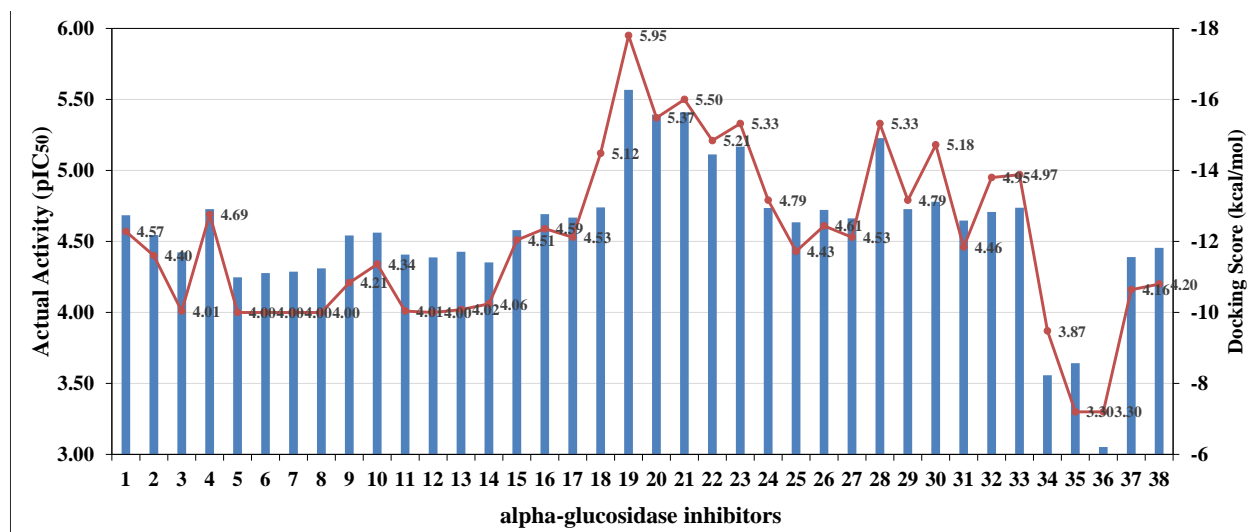

**Figure S3. The correlation between Actual activities (pIC<sub>50</sub>) of known inhibitors (compounds used in QSAR modeling) with their docking scores**



**Table S1. ADMET Properties of Selected 142 Hits**

| S# | Docking Rank | ZINC ID      | BBBP | HIA  | Metabolism                                                        | AT  | AOT | Carcinogenic | Predicted RAT AT<br>(LD50, mol/kg) | SA   |
|----|--------------|--------------|------|------|-------------------------------------------------------------------|-----|-----|--------------|------------------------------------|------|
| 1  | 2            | ZINC00625942 | No   | High | NS of 2C9, 2D6/Subs: 3A4 NI of 1A2, 2C9, 2D6, 2C19, 3A4           | No  | III | None         | 2.2874                             | 4.16 |
| 2  | 3            | ZINC08437173 | No   | High | NS of 2C9, 2D6/Subs: 3A4 NI of 1A2, 2C9, 2D6, 2C19, 3A4           | No  | III | None         | 2.5622                             | 3.71 |
| 3  | 5            | ZINC08897840 | No   | High | NS of 2C9, 2D6/Subs: 3A4 NI of 1A2, 2C9, 2D6, 2C19/Inh: 3A4       | No  | III | None         | 2.8031                             | 4.75 |
| 4  | 9            | ZINC17160090 | No   | High | NS of 2C9, 2D6/Subs: 3A4 NI of 1A2, 2D6 /Inh : 2C9, 2C19, 3A4     | No  | III | None         | 2.4068                             | 3.91 |
| 5  | 14           | ZINC08897840 | No   | High | NS of 2C9, 2D6/Subs: 3A4 NI of 1A2, 2D6, 2C19/Inh: 2C9, 2C19, 3A4 | No  | III | None         | 2.6357                             | 4.15 |
| 6  | 15           | ZINC08442042 | No   | High | NS of 2C9, 2D6/Subs: 3A4 NI of 1A2, 2C9, 2D6, 2C19/Inh: 3A4       | No  | III | None         | 2.6660                             | 4.95 |
| 7  | 16           | ZINC08411460 | No   | High | NS of 2C9, 2D6/Subs: 3A4 NI of 1A2, 2C9, 2D6, 2C19/Inh: 3A4       | No  | III | None         | 2.7487                             | 4.14 |
| 8  | 17           | ZINC09357898 | No   | High | NS of 2C9, 2D6/Subs: 3A4 NI of 1A2, 2D6, 2C19, 3A4/Inh: 2C9       | No  | III | None         | 2.5019                             | 3.96 |
| 9  | 18           | ZINC08438644 | No   | High | NS of 2C9, 2D6/Subs: 3A4 NI of 1A2, 2C9, 2D6, 2C19, 3A4           | No  | III | None         | 2.5939                             | 3.79 |
| 10 | 19           | ZINC08438658 | No   | High | NS of 2C9, 2D6/Subs: 3A4 NI of 1A2, 2C9, 2D6, 2C19, 3A4           | No  | III | None         | 2.5294                             | 3.92 |
| 11 | 21           | ZINC17160093 | No   | High | NS of 2C9, 2D6/Subs: 3A4 NI of 1A2, 2D6, /Inh: 2C9, 2C19, 3A4     | No  | III | None         | 2.4068                             | 3.91 |
| 12 | 23           | ZINC00625908 | No   | High | NS of 2C9, 2D6/Subs: 3A4 NI of 1A2, 2C9, 2D6, 2C19, 3A4           | No  | III | None         | 2.3654                             | 3.95 |
| 13 | 24           | ZINC08429954 | No   | High | NS of 2C9, 2D6/Subs: 3A4 NI of 1A2, 2D6, 3C19, 3A4/Inh: 2C9       | No  | III | None         | 2.3458                             | 3.59 |
| 14 | 25           | ZINC00711743 | No   | High | NS of 2C9, 2D6, 3A4/ NI of 2C9, 2D6, 3A4/Inh: 1A2, 2C19           | Yes | III | None         | 2.3628                             | 3.69 |
| 15 | 29           | ZINC08441316 | No   | High | NS of 2C9, 2D6/Subs: 3A4 NI of 1A2, 2C9, 2D6, 2C19, 3A4           | No  | III | None         | 2.5747                             | 4.25 |
| 16 | 30           | ZINC04473388 | No   | High | NS of 2C9, 2D6/Subs: 3A4 NI of 1A2, 2C9, 2D6, 2C19/Inh: 3A4       | No  | III | None         | 2.8109                             | 4.36 |
| 17 | 31           | ZINC08411329 | No   | High | NS of 2C9, 2D6/Subs: 3A4 NI of 1A2, 2C9, 2D6, 2C19, 3A4           | No  | III | None         | 2.7822                             | 4.53 |
| 18 | 32           | ZINC08440549 | No   | High | NS of 2C9, 2D6/Subs: 3A4 NI of 1A2, 2C9, 2D6, 2C19, 3A4           | No  | III | None         | 2.5495                             | 3.65 |
| 19 | 33           | ZINC08437172 | No   | High | NS of 2C9, 2D6/Subs: 3A4 NI of 1A2, 2C9, 2D6, 2C19, 3A4           | No  | III | None         | 2.5622                             | 3.71 |
| 20 | 34           | ZINC08441930 | No   | High | NS of 2C9, 2D6/Subs: 3A4 NI of 1A2, 2C9, 2D6, 2C19/Inh: 3A4       | No  | III | None         | 2.8031                             | 4.75 |
| 21 | 36           | ZINC08438652 | No   | High | NS of 2C9, 2D6/Subs: 3A4 NI of 1A2, 2C9, 2D6, 2C19, 3A4           | No  | III | None         | 2.5149                             | 4.26 |
| 22 | 37           | ZINC08441928 | No   | High | NS of 2C9, 2D6/Subs: 3A4 NI of 1A2, 2C9, 2D6, 2C19/Inh: 3A4       | No  | III | None         | 2.8031                             | 4.75 |
| 23 | 38           | ZINC08432474 | No   | High | NS of 2C9, 2D6, 3A4/NI of 1A2, 2D6, 3A4/Inh: 2C9, 2C19            | No  | III | None         | 2.4481                             | 3.69 |
| 24 | 42           | ZINC17160093 | No   | High | NS of 2C9, 2D6/Subs: 3A4 NI of 1A2, 2D6/Inh: 2C9, 2C19, 3A4       | No  | III | None         | 2.4068                             | 4.01 |
| 25 | 43           | ZINC05313283 | No   | High | NS of 2C9, 2D6/Subs: 3A4 NI of 1A2, 2C9, 2D6, 2C19, 3A4           | No  | III | None         | 2.5470                             | 3.23 |



|    |    |              |     |      |                                                               |    |     |      |        |      |
|----|----|--------------|-----|------|---------------------------------------------------------------|----|-----|------|--------|------|
| 26 | 44 | ZINC08438660 | No  | High | NS of 2C9, 2D6/Subs: 3A4 NI of 1A2, 2C9, 2D6, 2C19, 3A4       | No | III | None | 2.5294 | 3.92 |
| 27 | 45 | ZINC08438544 | No  | High | NS of 2C9, 2D6/Subs: 3A4 NI of 1A2, 2C9, 2D6, 2C19, 3A4       | No | III | None | 2.6553 | 3.70 |
| 28 | 46 | ZINC08437141 | No  | High | NS of 2C9, 2D6/Subs: 3A4 NI of 1A2, 2C9, 2D6, 2C19/Inh: 3A4   | No | III | None | 2.6140 | 4.55 |
| 29 | 48 | ZINC08430547 | No  | High | NS of 2C9, 2D6/Subs: 3A4 NI of 1A2, 2C9, 2D6, 2C19/Inh: 3A4   | No | III | None | 2.5604 | 3.63 |
| 30 | 51 | ZINC00625938 | No  | High | NS of 2C9, 2D6/Subs: 3A4 NI of 1A2, 2C9, 2D6, 2C19, 3A4       | No | III | None | 2.2874 | 4.16 |
| 31 | 53 | ZINC00625757 | No  | High | NS of 2C9, 2D6/Subs: 3A4 NI of 1A2, 2D6, 2C19, 3A4 /Inh: 2C9  | No | III | None | 2.3226 | 4.04 |
| 32 | 54 | ZINC00146770 | No  | High | NS of 2C9, 2D6, 3A4 /NI of 2C9, 2D6, 3A4 /Inh: 1A2, 2C19      | No | III | None | 2.2305 | 3.45 |
| 33 | 57 | ZINC08438548 | No  | High | NS of 2C9, 2D6/Subs: 3A4 NI of 1A2, 2C9, 2D6, 2C19, 3A4       | No | III | None | 2.5866 | 4.12 |
| 34 | 58 | ZINC00626525 | No  | High | NS of 2C9, 2D6 Subs: 3A4 NI of 1A2, 2D6, 2C19, Inh:2C9, 3A4   | No | III | None | 2.7568 | 3.81 |
| 35 | 59 | ZINC08431434 | No  | High | NS of 2C9, 2D6/Subs: 3A4 /Inh: 1A2, 2C9, 2D6, 2C19, 3A4       | No | III | None | 2.6779 | 3.12 |
| 36 | 60 | ZINC08411476 | No  | High | NS of 2C9, 2D6/Subs: 3A4 NI of 2D6, 1A2, 2C9, 2C19/Inh: 3A4   | No | III | None | 2.7487 | 4.14 |
| 34 | 61 | ZINC05313297 | No  | High | NS of 2C9, 2D6/Subs: 3A4 NI of 2D6, 1A2, 2C9, 2C19, 3A4       | No | III | None | 2.2890 | 3.99 |
| 38 | 62 | ZINC08437656 | No  | High | NS of 2C9, 2D6/Subs: 3A4 NI of 2D6, 1A2, 2C9, 3A4/Inh: 2C19   | No | III | None | 2.7198 | 3.17 |
| 39 | 64 | ZINC09070021 | No  | High | NS of 2C9, 2D6/Subs: 3A4 NI of 1A2, 2C9, 2D6, 2C19, 3A4       | No | III | None | 2.5569 | 4.41 |
| 40 | 65 | ZINC02159737 | No  | High | NS of 2C9, 2D6/Subs: 3A4 NI of 1A2, 2C9, 2D6, 2C19, 3A4       | No | III | None | 2.5576 | 3.66 |
| 41 | 67 | ZINC08438546 | No  | High | NS of 2C9, 2D6/Subs: 3A4 NI of 1A2, 2C9, 2D6, 2C19, 3A4       | No | III | None | 2.6553 | 3.70 |
| 42 | 70 | ZINC06144562 | No  | High | NS of 2C9, 2D6/Subs: 3A4 NI of 1A2, 2C9, 2D6, 2C19/Inh: 3A4   | No | III | None | 2.6033 | 4.55 |
| 43 | 71 | ZINC01413496 | No  | High | NS of 2C9, 2D6/Subs: 3A4 NI of 1A2, 2C9, 2D6, 2C19/Inh: 3A4   | No | III | None | 2.6476 | 3.78 |
| 44 | 72 | ZINC00703045 | No  | High | NS of 2C9, 2D6/Subs: 3A4 NI of 1A2, 2D6, 2C19, 3A4/Inh: 2C9   | No | III | None | 2.5338 | 4.41 |
| 45 | 74 | ZINC06904335 | No  | High | NS of 2C9, 2D6, 3A4 NI of 2D6, 3A4/Inh:1A2, 2C9, 2C19         | No | III | None | 2.4791 | 3.16 |
| 46 | 75 | ZINC08437908 | Yes | High | NS of 2C9, 2D6, 3A4 NI of 2C9 Inh:1A2, 2D6, 2C19, 3A4         | No | III | None | 2.4771 | 2.81 |
| 47 | 76 | ZINC00702446 | No  | High | NS of 2C9, 2D6/Subs: 3A4 NI of 1A2, 2D6, /Inh: 2C9, 2C19, 3A4 | No | III | None | 2.5607 | 3.86 |
| 48 | 77 | ZINC08437778 | No  | High | NS of 2C9, 2D6, 3A4 NI of 1A2, 2D6, 3A4/Inh: 2C9, 2C19        | No | III | None | 2.5821 | 2.61 |
| 49 | 78 | ZINC08435576 | No  | High | NS of 2C9, 2D6/Subs: 3A4 NI of 1A2, 2C9, 2D6, 2C19/Inh: 3A4   | No | III | None | 2.4160 | 3.95 |
| 50 | 79 | ZINC08438656 | No  | High | NS of 2C9, 2D6/Subs: 3A4 NI of 1A2, 2C9, 2D6, 2C19, 3A4       | No | III | None | 2.7125 | 3.89 |
| 51 | 82 | ZINC00626165 | No  | High | NS of 2C9, 2D6/Subs: 3A4 NI of 1A2, 2D6, 2C19, 3A4/Inh: 2C9   | No | III | None | 2.2696 | 3.90 |
| 52 | 83 | ZINC00702307 | No  | High | NS of 2C9, 2D6/Subs: 3A4 NI of 1A2, 2D6, 3A4/Inh: 2C9, 2C19   | No | III | None | 2.6782 | 3.67 |



|    |     |              |    |      |                                                             |    |     |      |        |      |
|----|-----|--------------|----|------|-------------------------------------------------------------|----|-----|------|--------|------|
| 53 | 84  | ZINC08438550 | No | High | NS of 2C9, 2D6/Subs: 3A4 NI of 1A2, 2C9, 2D6, 2C19, 3A4     | No | III | None | 2.5866 | 4.12 |
| 54 | 86  | ZINC08432903 | No | High | NS of 2C9, 2D6/Subs: 3A4 NI of 1A2, 2C9, 2D6, 2C19/Inh: 3A4 | No | III | None | 2.3286 | 3.30 |
| 55 | 87  | ZINC00703050 | No | High | NS of 2C9, 2D6/Subs: 3A4 NI of 1A2, 2C9, 2D6, 2C19, 3A4     | No | III | None | 2.5822 | 4.13 |
| 56 | 89  | ZINC08440218 | No | High | NS of 2C9, 2D6/Subs: 3A4 NI of 1A2, 2D6 Inh: 2C9, 2C19, 3A4 | No | III | None | 2.5607 | 3.86 |
| 57 | 90  | ZINC08432475 | No | High | NS of 2C9, 2D6, 3A4 NI of 1A2, 2D6, 3A4/Inh: 2C9, 2C19      | No | III | None | 2.4481 | 3.69 |
| 58 | 91  | ZINC08442014 | No | High | NS of 2C9, 2D6/Subs: 3A4 NI of 1A2, 2C9, 2D6, 2C19/Inh: 3A4 | No | III | None | 2.7165 | 5.03 |
| 59 | 92  | ZINC00625761 | No | High | NS of 2C9, 2D6/Subs: 3A4 NI of 1A2, 2D6, 2C19, 3A4/Inh: 2C9 | No | III | None | 2.3226 | 4.04 |
| 60 | 95  | ZINC17160093 | No | High | NS of 2C9, 2D6/Subs: 3A4 NI of 1A2, 2D6 Inh: 2C9, 2C19, 3A4 | No | III | None | 2.1764 | 3.85 |
| 61 | 96  | ZINC08435575 | No | High | NS of 2C9, 2D6/Subs: 3A4 NI of 1A2, 2C9, 2D6, 2C19/Inh: 3A4 | No | III | None | 2.2590 | 3.84 |
| 62 | 97  | ZINC00857151 | No | High | NS of 2C9, 2D6/Subs: 3A4 NI of 1A2, 2C9, 2D6, 3A4/Inh: 2C19 | No | III | None | 2.3238 | 3.12 |
| 63 | 99  | ZINC00983605 | No | High | NS of 2C9, 2D6/Subs: 3A4 NI of 1A2, 2D6, 3A4/Inh: 2C9, 2C19 | No | III | None | 2.4080 | 3.24 |
| 64 | 100 | ZINC15952849 | No | High | NS of 2C9, 2D6/Subs: 3A4 NI of 1A2, 2C9, 2D6, 2C19, 3A4     | No | III | None | 2.5438 | 4.52 |
| 65 | 101 | ZINC08437196 | No | High | NS of 2C9, 2D6/Subs: 3A4 NI of 1A2, 2C9, 2D6, 2C19/Inh: 3A4 | No | III | None | 2.5712 | 4.84 |
| 66 | 102 | ZINC00703108 | No | High | NS of 2C9, 2D6/Subs: 3A4 NI of 1A2, 2D6, 2C19, 3A4/Inh: 2C9 | No | III | None | 2.4043 | 4.29 |
| 67 | 104 | ZINC08435580 | No | High | NS of 2C9, 2D6/Subs: 3A4 NI of 1A2, 2C9, 2D6, 2C19, 3A4     | No | III | None | 2.5065 | 3.91 |
| 68 | 105 | ZINC02159741 | No | High | NS of 2C9, 2D6/Subs: 3A4 NI of 1A2, 2C9, 2D6, 3A4/Inh: 2C19 | No | III | None | 2.6893 | 3.44 |
| 69 | 106 | ZINC08417536 | No | High | NS of 2C9, 2D6, 3A4 NI of 1A2, 2C9, 2D6, 2C19, 3A4          | No | III | None | 2.1645 | 2.47 |
| 70 | 107 | ZINC09008533 | No | High | NS of 2C9, 2D6/Subs: 3A4 NI of 1A2, 2C9, 2D6, 2C19, 3A4     | No | III | None | 2.3979 | 3.52 |
| 71 | 108 | ZINC08441623 | No | High | NS of 2C9, 2D6/Subs: 3A4 NI of 1A2, 2C9, 2D6, 2C19, 3A4     | No | III | None | 2.6423 | 4.57 |
| 72 | 109 | ZINC08441892 | No | High | NS of 2C9, 2D6/Subs: 3A4 NI of 1A2, 2C9, 2D6, 2C19/Inh: 3A4 | No | III | None | 2.7922 | 4.87 |
| 73 | 111 | ZINC08437653 | No | High | NS of 2C9, 2D6/Subs: 3A4 NI of 1A2, 2C9, 2D6, 3A4/Inh: 2C19 | No | III | None | 2.6135 | 3.48 |
| 74 | 112 | ZINC08996455 | No | High | NS of 2C9, 2D6/Subs: 3A4 NI of 1A2, 2C9, 2D6, 2C19, 3A4     | No | III | None | 2.4253 | 4.23 |
| 75 | 113 | ZINC00832890 | No | High | NS of 2C9, 2D6/Subs: 3A4 NI of 1A2, 2C9, 2D6, 2C19, 3A4     | No | III | None | 2.2676 | 2.78 |
| 76 | 117 | ZINC06144561 | No | High | NS of 2C9, 2D6/Subs: 3A4 NI of 1A2, 2C9, 2D6, 2C19/Inh: 3A4 | No | III | None | 2.6033 | 4.55 |
| 77 | 120 | ZINC08435579 | No | High | NS of 2C9, 2D6/Subs: 3A4 NI of 1A2, 2C9, 2D6, 2C19, 3A4     | No | III | None | 2.3668 | 3.66 |
| 78 | 123 | ZINC00625713 | No | High | NS of 2C9, 2D6/Subs: 3A4 NI of 1A2, 2C9, 2D6, 2C19, 3A4     | No | III | None | 2.1747 | 4.24 |
| 79 | 124 | ZINC08441947 | No | High | NS of 2C9, 2D6/Subs: 3A4 NI of 1A2, 2C9, 2D6, 2C19/Inh: 3A4 | No | III | None | 2.8140 | 4.54 |



|     |     |              |     |      |                                                              |    |     |      |        |      |
|-----|-----|--------------|-----|------|--------------------------------------------------------------|----|-----|------|--------|------|
| 80  | 125 | ZINC08897821 | No  | High | NS of 2C9, 2D6/Subs: 3A4 NI of 1A2, 2D6, Inh: 2C9, 2C19, 3A4 | No | III | None | 2.6357 | 4.04 |
| 81  | 127 | ZINC09046651 | No  | High | NS of 2C9, 2D6/Subs: 3A4 NI of 1A2, 2C9, 2D6, 2C19, 3A4      | No | III | None | 2.6241 | 3.83 |
| 82  | 129 | ZINC08432386 | No  | High | NS of 2C9, 2D6/Subs: 3A4 NI of 1A2, 2D6, Inh: 2C9, 2C19, 3A4 | No | III | None | 2.4239 | 3.56 |
| 83  | 130 | ZINC17163315 | No  | High | NS of 2C9, 2D6/Subs: 3A4 NI of 1A2, 2D6, 3A4/Inh: 2C9, 2C19  | No | III | None | 2.6652 | 3.79 |
| 84  | 131 | ZINC00711757 | No  | High | NS of 2C9, 2D6/Subs: 3A4 NI of 2C9,2D6, 2C19, 3A4/Inh: 1A2   | No | III | None | 2.3503 | 3.72 |
| 85  | 132 | ZINC08440772 | No  | High | NS of 2C9, 2D6/Subs: 3A4 NI of 1A2, 2D6, 3A4/Inh: 2C9, 2C19  | No | III | None | 2.4859 | 3.71 |
| 86  | 133 | ZINC08441928 | No  | High | NS of 2C9, 2D6/Subs: 3A4 NI of 1A2, 2C9, 2D6, 2C19/Inh: 3A4  | No | III | None | 2.8227 | 4.71 |
| 87  | 134 | ZINC20032743 | No  | High | NS of 2C9, 2D6/Subs: 3A4 NI of 1A2, 2C9, 2D6, 2C19, 3A4      | No | III | None | 2.6780 | 4.72 |
| 88  | 135 | ZINC08414138 | No  | High | NS of 2C9, 2D6, 3A4/ NI of 1A2, 2C9, 2D6, 2C19, 3A4          | No | III | None | 2.2296 | 4.27 |
| 89  | 137 | ZINC08897821 | No  | High | NS of 2C9, 2D6/Subs: 3A4 NI of 1A2, 2D6, Inh: 2C9, 2C19, 3A4 | No | III | None | 2.6357 | 4.15 |
| 90  | 138 | ZINC01413485 | No  | High | NS of 2C9, 2D6/Subs: 3A4 NI of 1A2, 2C9, 2D6, 2C19, 3A4      | No | III | None | 2.6513 | 3.70 |
| 91  | 139 | ZINC08411504 | No  | High | NS of 2C9, 2D6/Subs: 3A4 NI of 1A2, 2C9 2D6, 3A4/Inh: 2C19   | No | III | None | 2.7955 | 4.44 |
| 92  | 140 | ZINC05286115 | No  | High | NS of 2C9, 2D6, 3A4 NI of 2C9 2D6, 2C19, 3A4 Inh: 1A2        | No | III | None | 2.2074 | 3.08 |
| 93  | 141 | ZINC08433219 | No  | High | NS of 2C9, 2D6/Subs: 3A4 NI of 1A2, 2C9, 2D6, 2C19, 3A4      | No | III | None | 2.5033 | 4.17 |
| 94  | 143 | ZINC00683816 | No  | High | NS of 2C9, 2D6/Subs: 3A4 NI of 2D6 /Inh: 1A2, 2C9, 2C19, 3A4 | No | III | None | 2.4657 | 3.11 |
| 95  | 144 | ZINC00292755 | Yes | High | NS of 2C9, 2D6, 3A4 NI of 2C9 Inh: 1A2, 2D6, 2C19, 3A4       | No | III | None | 2.5695 | 1.99 |
| 96  | 145 | ZINC01414766 | No  | High | NS of 2C9, 2D6/Subs: 3A4 NI of 1A2, 2C9, 2D6, 2C19/Inh: 3A4  | No | III | None | 2.6588 | 3.64 |
| 97  | 146 | ZINC06444803 | No  | High | NS of 2C9, 2D6/Subs: 3A4 NI of 1A2, 2C9, 2D6, 2C19, 3A4      | No | III | None | 2.2865 | 4.10 |
| 98  | 147 | ZINC08427102 | No  | High | NS of 2C9, 2D6/Subs: 3A4 NI of 1A2, 2C9, 2D6, 2C19/Inh: 3A4  | No | III | None | 2.8059 | 4.40 |
| 99  | 148 | ZINC17160090 | No  | High | NS of 2C9, 2D6/Subs: 3A4 NI of 1A2, 2D6, Inh: 2C9, 2C19, 3A4 | No | III | None | 2.4819 | 3.88 |
| 100 | 149 | ZINC08438781 | No  | High | NS of 2C9, 2D6/Subs: 3A4 NI of 1A2, 2C9, 2D6, 2C19, 3A4      | No | III | None | 2.6589 | 3.78 |
| 101 | 150 | ZINC08439872 | No  | High | NS of 2C9, 2D6/Subs: 3A4 NI of 1A2, 2C9, 2D6, 2C19, 3A4      | No | III | None | 2.4875 | 3.78 |
| 102 | 152 | ZINC19989886 | No  | High | NS of 2C9, 2D6/Subs: 3A4 NI of 1A2, 2C9, 2D6, 2C19, 3A4      | No | III | None | 2.6528 | 3.43 |
| 103 | 153 | ZINC08441926 | No  | High | NS of 2C9, 2D6/Subs: 3A4 NI of 1A2, 2C9, 2D6, 2C19/Inh: 3A4  | No | III | None | 2.8031 | 4.75 |
| 104 | 154 | ZINC08432384 | No  | High | NS of 2C9, 2D6, 3A4 NI of 2C9 Inh:1A2, 2D6, 2C19, 3A4        | No | III | None | 2.4985 | 3.26 |
| 105 | 157 | ZINC08414555 | No  | High | NS of 2C9, 2D6/Subs: 3A4 NI of 1A2, 2D6, Inh: 2C9, 2C19, 3A4 | No | III | None | 2.3962 | 3.85 |
| 106 | 159 | ZINC00646487 | No  | High | NS of 2C9, 2D6/Subs: 3A4 NI of 2D6, 2C19 Inh: 1A2, 2C9, 3A4  | No | III | None | 2.5795 | 4.59 |



|     |     |              |     |      |                                                              |    |     |      |        |      |
|-----|-----|--------------|-----|------|--------------------------------------------------------------|----|-----|------|--------|------|
| 107 | 160 | ZINC09046768 | No  | High | NS of 2C9, 2D6/Subs: 3A4 NI of 1A2, 2C9, 2D6, 2C19, 3A4      | No | III | None | 2.6584 | 4.32 |
| 108 | 162 | ZINC00692735 | No  | High | NS of 2C9, 2D6/Subs: 3A4 NI of 1A2, 2C9, 2D6, 3A4/Inh: 2C19  | No | III | None | 2.3881 | 3.03 |
| 109 | 163 | ZINC02162053 | No  | High | NS of 2C9, 2D6/Subs: 3A4 NI of 2D6, 3A4 Inh: 1A2, 2C9, 2C19  | No | III | None | 2.6042 | 3.38 |
| 110 | 165 | ZINC08441462 | No  | High | NS of 2C9, 2D6/Subs: 3A4 NI of 1A2, 2C9, 2D6, 2C19, 3A4      | No | III | None | 2.4768 | 4.70 |
| 111 | 166 | ZINC08437911 | Yes | High | NS of 2C9, 2D6, 3A4 /NI of 2C9, Inh: 1A2, 2D6, 2C19, 3A4     | No | III | None | 2.4771 | 2.79 |
| 112 | 167 | ZINC01795564 | No  | High | NS of 2C9, 2D6/Subs: 3A4 NI of 1A2, 2C9, 2D6, 2C19/Inh: 3A4  | No | III | None | 2.5882 | 4.72 |
| 113 | 168 | ZINC01413497 | No  | High | NS of 2C9, 2D6/Subs: 3A4 NI of 1A2, 2C9, 2D6, 2C19/Inh: 3A4  | No | III | None | 2.6476 | 3.78 |
| 114 | 169 | ZINC08429897 | No  | High | NS of 2C9, 2D6/Subs: 3A4 NI of 2D6, 3A4 Inh: 1A2, 2C9, 2C19  | No | III | None | 2.6407 | 3.84 |
| 115 | 171 | ZINC08437218 | No  | High | NS of 2C9, 2D6/Subs: 3A4 NI of 1A2, 2C9, 2D6, 2C19/Inh: 3A4  | No | III | None | 2.6421 | 4.92 |
| 116 | 172 | ZINC00665548 | No  | High | NS of 2C9, 2D6/Subs: 3A4 NI of 1A2, 2D6, Inh: 2C9, 2C19, 3A4 | No | III | None | 2.5292 | 3.01 |
| 117 | 173 | ZINC08437199 | No  | High | NS of 2C9, 2D6/Subs: 3A4 NI of 1A2, 2D6, Inh: 2C9, 2C19, 3A4 | No | III | None | 2.5439 | 5.16 |
| 118 | 174 | ZINC00702987 | No  | High | NS of 2C9, 2D6/Subs: 3A4 NI of 1A2, 2C9, 2D6, 2C19, 3A4      | No | III | None | 2.8256 | 4.34 |
| 119 | 175 | ZINC00630492 | No  | High | NS of 2C9, 2D6/Subs: 3A4 NI of 2D6/Inh: 1A2, 2C9, 2C19, 3A4  | No | III | None | 2.2816 | 4.02 |
| 120 | 177 | ZINC08441601 | No  | High | NS of 2C9, 2D6/Subs: 3A4 NI of 2D6 /Inh: 1A2, 2C9, 2C19, 3A4 | No | III | None | 2.6660 | 5.09 |
| 121 | 178 | ZINC02067899 | Yes | High | NS of 2C9, 2D6, 3A4 /NI of 2D6 3A4 / Inh: 1A2, 2C9, 2C19     | No | III | None | 2.5076 | 2.97 |
| 122 | 179 | ZINC08430546 | No  | High | NS of 2C9, 2D6, 3A4 NI of 1A2, 2C9, 2D6, 2C19 Inh: 3A4       | No | III | None | 2.5333 | 3.65 |
| 123 | 180 | ZINC08431354 | No  | High | NS of 2C9, 2D6, 3A4 NI of 2C9, 2D6, 2C19, 3A4 Inh: 1A2       | No | III | None | 2.4481 | 3.17 |
| 124 | 181 | ZINC00984875 | No  | High | NS of 2C9, 2D6/Subs: 3A4 NI of 1A2, 2C9, 2D6, 2C19/Inh: 3A4  | No | III | None | 2.2982 | 3.86 |
| 125 | 182 | ZINC02479986 | No  | High | NS of 2C9, 2D6, 3A4 NI of 1A2, 2C9, 2D6, 2C19, 3A4           | No | III | None | 2.5472 | 3.62 |
| 126 | 183 | ZINC08441602 | No  | High | NS of 2C9, 2D6/Subs: 3A4 NI of 1A2, 2D6, 3A4 /Inh: 2C9, 2C19 | No | III | None | 2.4508 | 3.77 |
| 127 | 184 | ZINC00702427 | No  | High | NS of 2C9, 2D6/Subs: 3A4 NI of 1A2, 2D6, 3A4 /Inh: 2C9, 2C19 | No | III | None | 2.9770 | 3.77 |
| 128 | 185 | ZINC08414444 | Yes | High | NS of 2C9, 2D6/Subs: 3A4 NI of 1A2, 2C9, 2D6 /Inh: 2C19, 3A4 | No | III | None | 2.4908 | 4.13 |
| 129 | 186 | ZINC06144543 | No  | High | NS of 2C9, 2D6/Subs: 3A4 NI of 1A2, 2C9, 2D6, 2C19/Inh: 3A4  | No | III | None | 2.6320 | 4.45 |
| 130 | 187 | ZINC08411455 | No  | High | NS of 2C9, 2D6/Subs: 3A4 NI of 1A2, 2C9, 2D6, 2C19, 3A4      | No | III | None | 2.6989 | 436  |
| 131 | 188 | ZINC08429898 | No  | High | NS of 2C9, 2D6/Subs: 3A4 NI of 2D6, 3A4 Inh: 1A2, 2C9, 2C19  | No | III | None | 2.6407 | 3.84 |
| 132 | 190 | ZINC01952505 | No  | High | NS of 2C9, 2D6/Subs: 3A4 NI of 1A2, 2C9, 2D6, 3A4 /Inh: 2C19 | No | III | None | 2.6063 | 3.71 |
| 133 | 191 | ZINC08433001 | No  | High | NS of 2C9, 2D6, 3A4 NI of 1A2, 2C9, 2D6, 2C19 Inh: 3A4       | No | III | None | 2.3507 | 3.97 |



|     |     |              |     |      |                                                              |    |     |      |        |      |
|-----|-----|--------------|-----|------|--------------------------------------------------------------|----|-----|------|--------|------|
| 134 | 192 | ZINC08425651 | No  | High | NS of 2C9, 2D6/Subs: 3A4 NI of 1A2, 2C9, 2D6, 2C19, 3A4      | No | III | None | 2.6947 | 4.48 |
| 135 | 194 | ZINC05919492 | No  | High | NS of 2C9, 2D6, 3A4 NI of 1A2, 2C9, 2D6, 2C19, 3A4           | No | III | None | 2.7030 | 4.37 |
| 136 | 195 | ZINC08436971 | No  | High | NS of 2C9, 2D6/Subs: 3A4 NI of 1A2, 2D6, 2C19, 3A4 /Inh: 2C9 | No | III | None | 2.6982 | 3.21 |
| 137 | 196 | ZINC08817408 | Yes | High | NS of 2C9, 2D6/Subs: 3A4 NI of 1A2, 2C9, 2D6, 2C19, 3A4      | No | III | None | 2.6672 | 3.68 |
| 138 | 197 | ZINC08411308 | No  | High | NS of 2C9, 2D6/Subs: 3A4 NI of 1A2, 2C9, 2D6, 3A4 /Inh: 2C19 | No | III | None | 2.7551 | 4.75 |
| 139 | 199 | ZINC08427099 | No  | High | NS of 2C9, 2D6/Subs: 3A4 NI of 1A2, 2C9, 2D6, 2C19/Inh: 3A4  | No | III | None | 2.7109 | 4.41 |
| 140 | 200 | ZINC08437082 | No  | High | NS of 2C9, 2D6/Subs: 3A4 NI of 1A2, 2C9, 2D6, 2C19, 3A4      | No | III | None | 2.3994 | 4.02 |
| 141 | 201 | ZINC08437193 | No  | High | NS of 2C9, 2D6/Subs: 3A4 NI of 1A2, 2C9, 2D6, 2C19/Inh: 3A4  | No | III | None | 2.5712 | 4.84 |
| 142 | 202 | ZINC08417802 | No  | High | NS of 2C9, 2D6, 3A4/NI of 1A2, 2C9, 2D6, 2C19, 3A4           | No | III | None | 2.4833 | 3.06 |

BBBP: blood brain barrier permeant, HIA: human intestinal absorption, NS: non-substrates, NI: non-inhibitor, Subs: substrate, Inh: inhibitor, AT: AMES toxicity, AOT: acute oral toxicity, SA: synthetic accessibility. The compounds that show excellent pharmacokinetic profile are highlighted with green color.



**Table S2. The docking scores, docking ranks and protein-ligand interactions of 142 Hits**

| Compounds | QSAR Predicted Activity | Docking Rank | ZINC ID      | Docking Score | Protein-ligand Interactions |               |               |              |
|-----------|-------------------------|--------------|--------------|---------------|-----------------------------|---------------|---------------|--------------|
|           |                         |              |              |               | LA                          | RA            | Bond          | Distance (Å) |
| 1         | 6.32                    | 2            | ZINC00625942 | -21.43        | N63                         | OE1-GLU276    | HBD           | 3.36         |
|           |                         |              |              |               | N47                         | OD1-ASP214    | ionic         | 3.87         |
|           |                         |              |              |               | N47                         | OD2-ASP214    | ionic         | 3.82         |
|           |                         |              |              |               | N47                         | OE1-GLU276    | ionic         | 3.64         |
|           |                         |              |              |               | N63                         | OE1-GLU276    | ionic         | 3.36         |
|           |                         |              |              |               | N63                         | OE2-GLU276    | ionic         | 2.99         |
| 2         | 6.96                    | 3            | ZINC08437173 | -21.16        | N52                         | OD1-ASP349    | HBD           | 3.28         |
|           |                         |              |              |               | O13                         | O-HOH1174     | HBA           | 2.08         |
|           |                         |              |              |               | O51                         | NE-ARG312     | ionic         | 2.60         |
|           |                         |              |              |               | O51                         | NH2-ARG312    | ionic         | 3.44         |
|           |                         |              |              |               | N52                         | OD1-ASP349    | ionic         | 3.28         |
|           |                         |              |              |               | N52                         | OD2-ASP349    | ionic         | 2.85         |
| 3         |                         | 5            | ZINC08897840 | -20.34        | N50                         | O-HOH1174     | HBA           | 3.12         |
|           |                         |              |              |               | N54                         | NH2-ARG212    | HBA           | 2.65         |
|           |                         |              |              |               | N54                         | NE2-HIS348    | HBA           | 2.71         |
|           |                         |              |              |               | N59                         | OD1-ASP68     | ionic         | 3.24         |
|           |                         |              |              |               | N59                         | OD2-ASP68     | ionic         | 2.95         |
|           |                         |              |              |               | N61                         | OE1-GLU276    | ionic         | 2.53         |
| 4         |                         | 9            | ZINC17160090 | -19.57        | N61                         | OE2-GLU276    | ionic         | 1.79         |
|           |                         |              |              |               | N42                         | OD1-ASP214    | ionic         | 3.67         |
|           |                         |              |              |               | N42                         | OE1-GLU276    | ionic         | 3.62         |
|           |                         |              |              |               | N42                         | OE2-GLU276    | ionic         | 3.68         |
|           |                         |              |              |               | N42                         | OD2-ASP349    | ionic         | 3.41         |
|           |                         |              |              |               | N47                         | OD1-ASP214    | ionic         | 2.61         |
|           |                         |              |              |               | N47                         | OD2-ASP214    | ionic         | 3.68         |
|           |                         |              |              |               | O51                         | NE-ARG312     | ionic         | 2.57         |
|           |                         |              |              |               | O51                         | NH1-ARG312    | ionic         | 3.67         |
| 5         |                         | 14           | ZINC08897840 | -19.16        | O51                         | NH2-ARG312    | ionic         | 2.94         |
|           |                         |              |              |               | O30                         | NE-ARG312     | ionic         | 2.57         |
|           |                         |              |              |               | O30                         | NH2-ARG312    | ionic         | 3.14         |
|           |                         |              |              |               | N45                         | OD2-ASP68     | ionic         | 3.53         |
|           |                         |              |              |               | N52                         | OD1-ASP214    | ionic         | 3.35         |
| 6         |                         | 15           | ZINC08442042 | -19.10        | N52                         | OD2-ASP214    | ionic         | 2.86         |
|           |                         |              |              |               | N42                         | OD1-ASN241    | HBD           | 3.45         |
|           |                         |              |              |               | O31                         | NE2-HIS348    | HBA           | 3.06         |
|           |                         |              |              |               | 5-ring                      | 6-ring-PHE157 | $\pi$ - $\pi$ | 3.43         |
| 7         |                         | 16           | ZINC08411460 | -19.10        | N30                         | O-HOH1056     | HBA           | 2.77         |
|           |                         |              |              |               | N42                         | OD1-ASP349    | ionic         | 2.53         |
|           |                         |              |              |               | N42                         | OD2-ASP349    | ionic         | 2.71         |
| 8         |                         | 17           | ZINC09357898 | -19.08        | N27                         | OD2-ASP214    | ionic         | 3.26         |
|           |                         |              |              |               | N32                         | OD1-ASP214    | ionic         | 2.52         |
|           |                         |              |              |               | N32                         | OD2-ASP214    | ionic         | 1.44         |
|           |                         |              |              |               | O36                         | NE-ARG439     | ionic         | 3.43         |
|           |                         |              |              |               | 6-ring                      | O-HOH1174     | H- $\pi$      | 3.46         |
| 9         |                         | 18           | ZINC08438644 | -19.07        | O40                         | NE-ARG312     | ionic         | 1.89         |
|           |                         |              |              |               | O40                         | NH1-ARG312    | ionic         | 2.97         |
|           |                         |              |              |               | O40                         | NH2-ARG312    | ionic         | 1.89         |
|           |                         |              |              |               | O42                         | NE-ARG312     | ionic         | 3.45         |
|           |                         |              |              |               | O42                         | NH1-ARG312    | ionic         | 3.62         |
|           |                         |              |              |               | N56                         | OD2-ASP349    | ionic         | 3.75         |
| 10        |                         | 19           | ZINC08438658 | -19.05        | O17                         | NE-ARG312     | HBA           | 3.32         |
|           |                         |              |              |               | O17                         | NE-ARG312     | ionic         | 3.32         |
|           |                         |              |              |               | O57                         | NE-ARG312     | ionic         | 2.29         |
|           |                         |              |              |               | O57                         | NH1-ARG312    | ionic         | 3.34         |
|           |                         |              |              |               | O57                         | NH2-ARG312    | ionic         | 2.84         |
|           |                         |              |              |               | N58                         | OD2-ASP349    | ionic         | 3.82         |
| 11        |                         | 21           | ZINC17160093 | -18.99        | N42                         | OD2-ASP349    | ionic         | 3.42         |
|           |                         |              |              |               | N47                         | OD1-ASP214    | ionic         | 2.54         |
|           |                         |              |              |               | N47                         | OD2-ASP349    | ionic         | 3.83         |
|           |                         |              |              |               | O51                         | NE-ARG312     | ionic         | 2.46         |
|           |                         |              |              |               | O51                         | NH1-ARG312    | ionic         | 3.88         |
|           |                         |              |              |               | O51                         | NH2-ARG312    | ionic         | 3.25         |
| 12        |                         | 23           | ZINC00625908 | -18.88        | 6-ring                      | CD-ARG312     | H- $\pi$      | 4.47         |
|           |                         |              |              |               | N16                         | OD2-ASP349    | HBD           | 3.38         |
|           |                         |              |              |               | N57                         | OE1-GLU276    | HBD           | 3.06         |
|           |                         |              |              |               | N5                          | OE1-GLU276    | ionic         | 3.60         |
|           |                         |              |              |               | N5                          | OE2-GLU276    | ionic         | 3.74         |
|           |                         |              |              |               | N16                         | OD1-ASP349    | ionic         | 3.76         |
|           |                         |              |              |               | N16                         | OD2-ASP349    | ionic         | 3.38         |
|           |                         |              |              |               | N57                         | OE1-GLU276    | ionic         | 3.06         |
|           |                         |              |              |               | N57                         | OE2-GLU276    | ionic         | 2.99         |



|    |    |              |        |        |               |               |      |
|----|----|--------------|--------|--------|---------------|---------------|------|
| 13 | 24 | ZINC08429954 | -18.87 | O26    | NH1-ARG439    | HBA           | 3.05 |
|    |    |              |        | O41    | NE-ARG312     | ionic         | 2.96 |
|    |    |              |        | O41    | NH1-ARG312    | ionic         | 3.97 |
|    |    |              |        | O41    | NH2-ARG312    | ionic         | 2.88 |
| 14 | 25 | ZINC00711743 | -18.86 | O35    | OD1-ASP214    | HBD           | 2.96 |
| 15 | 29 | ZINC08441316 | -18.66 | N57    | OD1-ASP214    | HBD           | 2.67 |
|    |    |              |        | N57    | OD1-ASP214    | ionic         | 2.67 |
|    |    |              |        | N57    | OD2-ASP214    | ionic         | 3.62 |
| 16 | 30 | ZINC04473388 | -18.57 | N49    | O-HOH1228     | HBD           | 2.52 |
|    |    |              |        | N28    | O-HOH1056     | HBA           | 3.20 |
|    |    |              |        | N51    | OD1-ASP349    | ionic         | 3.46 |
|    |    |              |        | N51    | OD2-ASP349    | ionic         | 2.76 |
|    |    |              |        | 6-ring | 6-ring-PHE157 | $\pi$ - $\pi$ | 3.80 |
| 17 | 31 | ZINC08411329 | -18.48 | N50    | OD1-ASP349    | HBD           | 2.05 |
|    |    |              |        | O10    | O-HOH1174     | HBA           | 2.74 |
|    |    |              |        | N32    | O-HOH1056     | HBA           | 2.32 |
|    |    |              |        | N50    | OD1-ASP349    | ionic         | 2.05 |
|    |    |              |        | N50    | OD2-ASP349    | ionic         | 2.61 |
| 18 | 32 | ZINC08440549 | -18.46 | O38    | NE-ARG312     | ionic         | 3.33 |
| 19 | 33 | ZINC08437172 | -18.42 | O44    | NH1-ARG212    | HBA           | 2.97 |
|    |    |              |        | O44    | NH2-ARG212    | HBA           | 2.94 |
|    |    |              |        | O13    | NH1-ARG439    | ionic         | 3.80 |
|    |    |              |        | N52    | OD1-ASP214    | ionic         | 3.77 |
| 20 | 34 | ZINC08441930 | -18.35 | N61    | OD2-ASP214    | HBD           | 2.73 |
|    |    |              |        | N61    | OE1-GLU276    | HBD           | 2.56 |
|    |    |              |        | N61    | OH-THR215     | HBD           | 2.16 |
|    |    |              |        | N52    | O-HOH1026     | HBA           | 2.51 |
|    |    |              |        | N59    | OD1-ASP68     | ionic         | 2.98 |
|    |    |              |        | N59    | OD2-ASP68     | ionic         | 3.00 |
|    |    |              |        | N61    | OD1-ASP214    | ionic         | 2.58 |
|    |    |              |        | N61    | OD2-ASP214    | ionic         | 2.73 |
|    |    |              |        | N61    | OE1-GLU276    | ionic         | 2.56 |
| 21 | 36 | ZINC08438652 | -18.30 | N61    | OE2-GLU276    | ionic         | 3.65 |
|    |    |              |        | O51    | O-HOH1174     | HBA           | 2.18 |
|    |    |              |        | O49    | NE-ARG312     | ionic         | 2.37 |
|    |    |              |        | O49    | NH2-ARG312    | ionic         | 3.16 |
| 22 | 37 | ZINC08441928 | -18.29 | N60    | OD2-ASP68     | ionic         | 3.61 |
|    |    |              |        | N61    | OE2-GLU276    | HBD           | 2.61 |
|    |    |              |        | N59    | OD1-ASP68     | ionic         | 3.65 |
|    |    |              |        | N59    | OD2-ASP68     | ionic         | 1.53 |
|    |    |              |        | N61    | OD1-ASP214    | ionic         | 3.36 |
|    |    |              |        | N61    | OE1-GLU276    | ionic         | 2.24 |
| 23 | 38 | ZINC08432474 | -18.28 | N61    | OE2-GLU276    | ionic         | 2.61 |
|    |    |              |        | N61    | OD2-ASP349    | ionic         | 3.75 |
|    |    |              |        | O10    | O-HOH1102     | HBA           | 3.23 |
|    |    |              |        | O23    | NE-ARG312     | HBA           | 2.37 |
|    |    |              |        | N38    | OD1-ASP349    | ionic         | 2.51 |
| 24 | 42 | ZINC17160093 | -18.14 | N38    | OD2-ASP349    | ionic         | 2.29 |
|    |    |              |        | O24    | NH2-ARG312    | ionic         | 3.63 |
|    |    |              |        | N34    | OD1-ASP349    | ionic         | 3.81 |
|    |    |              |        | O49    | NE-ARG312     | ionic         | 2.21 |
|    |    |              |        | O49    | NH1-ARG312    | ionic         | 3.02 |
|    |    |              |        | O49    | NH2-ARG312    | ionic         | 2.59 |
|    |    |              |        | N50    | OD2-ASP68     | ionic         | 3.86 |
| 25 | 43 | ZINC05313283 | -18.14 | N50    | OD1-ASP214    | ionic         | 3.56 |
|    |    |              |        | O13    | NE-ARG312     | HBA           | 2.96 |
|    |    |              |        | N5     | OD1-ASP408    | ionic         | 3.22 |
|    |    |              |        | N5     | OD2-ASP408    | ionic         | 3.61 |
|    |    |              |        | N49    | OD2-ASP68     | ionic         | 3.14 |
|    |    |              |        | N51    | OD1-ASP349    | ionic         | 3.83 |
| 26 | 44 | ZINC08438660 | -18.05 | N51    | OD1-ASP408    | ionic         | 3.71 |
|    |    |              |        | N58    | OD2-ASP349    | HBD           | 2.40 |
|    |    |              |        | O57    | NE-ARG312     | ionic         | 3.32 |
|    |    |              |        | O57    | NH2-ARG312    | ionic         | 3.82 |
|    |    |              |        | N58    | OD1-ASP349    | ionic         | 2.68 |
| 27 | 45 | ZINC08438544 | -18.05 | N58    | OD2-ASP349    | ionic         | 2.40 |
|    |    |              |        | O25    | NE-ARG312     | ionic         | 3.22 |
|    |    |              |        | O25    | NH1-ARG312    | ionic         | 3.36 |
|    |    |              |        | N54    | OD2-ASP349    | ionic         | 3.74 |
|    |    |              |        | 6-ring | CD-ARG312     | H- $\pi$      | 4.20 |
| 28 | 46 | ZINC08437141 | -18.04 | N12    | OD1-ASP349    | HBD           | 2.59 |
|    |    |              |        | O26    | OD1-ASP214    | HBD           | 2.31 |
|    |    |              |        | O26    | NH2-ARG212    | HBA           | 2.66 |
|    |    |              |        | N12    | OD1-ASP349    | ionic         | 2.59 |
|    |    |              |        | N12    | OD2-ASP349    | ionic         | 2.79 |



|    |    |              |        | 6-ring | 6-ring-PHE157 | $\pi$ - $\pi$ | 3.49 |
|----|----|--------------|--------|--------|---------------|---------------|------|
| 29 | 48 | ZINC08430547 | -18.01 | N58    | OD1-ASP214    | HBD           | 2.67 |
|    |    |              |        | O51    | NH1-ARG439    | HBA           | 2.94 |
|    |    |              |        | O51    | O-HOH1026     | HBA           | 2.17 |
|    |    |              |        | N58    | OD1-ASP214    | ionic         | 2.67 |
|    |    |              |        | N58    | OD2-ASP214    | ionic         | 3.22 |
| 30 | 51 | ZINC00625938 | -17.94 | N28    | OG1-THR215    | HBD           | 2.65 |
|    |    |              |        | N63    | OE1-GLU276    | HBD           | 2.22 |
|    |    |              |        | O49    | O-HOH1026     | HBA           | 2.55 |
|    |    |              |        | N28    | OE1-GLU276    | ionic         | 2.71 |
|    |    |              |        | N28    | OE2-GLU276    | ionic         | 3.21 |
|    |    |              |        | N47    | OD1-ASP214    | ionic         | 3.38 |
|    |    |              |        | N47    | OD2-ASP349    | ionic         | 3.14 |
|    |    |              |        | N63    | OD1-ASP214    | ionic         | 3.56 |
|    |    |              |        | N63    | OE1-GLU276    | ionic         | 2.22 |
|    |    |              |        | N63    | OE2-GLU276    | ionic         | 2.69 |
|    |    |              |        | 6-ring | O-HOH1174     | H- $\pi$      | 3.43 |
| 31 | 53 | ZINC00625757 | -17.91 | N60    | OG1-THR215    | HBD           | 2.31 |
|    |    |              |        | N44    | OD1-ASP214    | ionic         | 3.62 |
|    |    |              |        | N44    | OD2-ASP214    | ionic         | 3.51 |
|    |    |              |        | N60    | OE1-GLU276    | ionic         | 3.91 |
| 32 | 54 | ZINC00146770 | -17.91 | N30    | OD2-ASP349    | HBD           | 2.61 |
|    |    |              |        | S22    | NH1-ARG439    | HBA           | 2.76 |
|    |    |              |        | O24    | O-HOH1102     | HBA           | 2.88 |
|    |    |              |        | N30    | OE2-GLU276    | ionic         | 3.45 |
|    |    |              |        | N30    | OD1-ASP349    | ionic         | 3.44 |
|    |    |              |        | N30    | OD2-ASP349    | ionic         | 2.61 |
| 33 | 57 | ZINC08438548 | -17.89 | O16    | NE-ARG312     | ionic         | 3.47 |
|    |    |              |        | O16    | NH1-ARG312    | ionic         | 3.32 |
|    |    |              |        | O16    | NH2-ARG312    | ionic         | 3.68 |
|    |    |              |        | O62    | NE-ARG312     | ionic         | 2.32 |
|    |    |              |        | O62    | NH1-ARG312    | ionic         | 3.34 |
|    |    |              |        | O62    | NH2-ARG312    | ionic         | 1.62 |
|    |    |              |        | N63    | OD1-ASP349    | ionic         | 3.66 |
| 34 | 58 | ZINC00626525 | -17.89 | O33    | NE-ARG439     | ionic         | 3.06 |
|    |    |              |        | O33    | NH1-ARG439    | ionic         | 1.98 |
|    |    |              |        | O33    | NH2-ARG439    | ionic         | 3.12 |
|    |    |              |        | 6-ring | 6-ring-PHE157 | $\pi$ - $\pi$ | 3.45 |
| 35 | 59 | ZINC08431434 | -17.85 | N40    | OE1-GLU276    | HBD           | 2.52 |
|    |    |              |        | N35    | OD1-ASP214    | ionic         | 3.86 |
|    |    |              |        | N40    | OD1-ASP214    | ionic         | 2.61 |
|    |    |              |        | N40    | OD2-ASP214    | ionic         | 3.57 |
|    |    |              |        | N40    | OE1-GLU276    | ionic         | 2.52 |
|    |    |              |        | N40    | OE2-GLU276    | ionic         | 3.25 |
|    |    |              |        | 6-ring | CD-ARG312     | H- $\pi$      | 3.52 |
| 36 | 60 | ZINC08411476 | -17.83 | N42    | OD1-ASP349    | HBD           | 2.71 |
|    |    |              |        | N26    | O-HOH1228     | HBA           | 2.50 |
|    |    |              |        | N30    | NE-ARG312     | HBA           | 2.57 |
|    |    |              |        | N42    | OD1-ASP349    | ionic         | 2.71 |
|    |    |              |        | N42    | OD2-ASP349    | ionic         | 3.04 |
| 37 | 61 | ZINC05313297 | -17.82 | N10    | OD1-ASP68     | HBD           | 3.38 |
| 38 | 62 | ZINC08437656 | -17.81 | N21    | O-HOH1174     | HBA           | 2.67 |
|    |    |              |        | N42    | OE2-GLU276    | ionic         | 2.86 |
|    |    |              |        | N42    | OD2-ASP349    | ionic         | 3.70 |
| 39 | 64 | ZINC09070021 | -17.76 | N59    | OE2-GLU276    | HBD           | 3.23 |
|    |    |              |        | N59    | OE1-GLU276    | ionic         | 3.30 |
|    |    |              |        | N59    | OE2-GLU276    | ionic         | 3.23 |
|    |    |              |        | N59    | OD2-ASP349    | ionic         | 3.49 |
|    |    |              |        | 6-ring | 6-ring-PHE157 | $\pi$ - $\pi$ | 3.55 |
| 40 | 65 | ZINC02159737 | -17.73 | N31    | O-HOH1102     | HBD           | 1.90 |
|    |    |              |        | N56    | OD2-ASP349    | ionic         | 3.59 |
|    |    |              |        | 6-ring | CE1-HIS239    | H- $\pi$      | 4.24 |
| 41 | 67 | ZINC08438546 | -17.60 | N54    | OD2-ASP214    | HBD           | 2.78 |
|    |    |              |        | O24    | NH1-ARG439    | HBA           | 2.66 |
|    |    |              |        | N54    | OD1-ASP214    | ionic         | 2.96 |
|    |    |              |        | N54    | OD2-ASP214    | ionic         | 2.78 |
|    |    |              |        | N54    | OE1-GLU276    | ionic         | 3.66 |
| 42 | 70 | ZINC06144562 | -17.56 | N15    | OD1-ASP349    | ionic         | 3.58 |
|    |    |              |        | N15    | OD2-ASP349    | ionic         | 3.70 |
| 43 | 71 | ZINC01413496 | -17.56 | O57    | O-HOH1174     | HBA           | 2.12 |
|    |    |              |        | O24    | NE-ARG312     | ionic         | 2.88 |
|    |    |              |        | O24    | NH2-ARG312    | ionic         | 3.56 |
| 44 | 72 | ZINC00703045 | -17.54 | O42    | NE-ARG439     | ionic         | 3.17 |
|    |    |              |        | O42    | NH1-ARG439    | ionic         | 3.01 |
| 45 | 74 | ZINC06904335 | -17.53 | N22    | OD2-ASP214    | HBD           | 3.56 |



|    |    |              |        |        |            |          |      |
|----|----|--------------|--------|--------|------------|----------|------|
|    |    |              |        | O18    | NH1-ARG439 | ionic    | 3.33 |
| 46 | 75 | ZINC08437908 | -17.52 | N46    | OE1-GLU276 | HBD      | 3.25 |
|    |    |              |        | N46    | OE1-GLU276 | ionic    | 3.25 |
|    |    |              |        | N46    | OE2-GLU276 | ionic    | 2.92 |
| 47 | 76 | ZINC00702446 | -17.51 | N37    | OD1-ASP214 | HBD      | 2.38 |
|    |    |              |        | N32    | OD1-ASP349 | ionic    | 3.67 |
|    |    |              |        | N32    | OD2-ASP349 | ionic    | 3.55 |
|    |    |              |        | N37    | OD1-ASP214 | ionic    | 2.38 |
|    |    |              |        | N37    | OD2-ASP214 | ionic    | 3.39 |
|    |    |              |        | N37    | OE1-GLU276 | ionic    | 3.41 |
| 48 | 77 | ZINC08437778 | -17.50 | N46    | OD1-ASP214 | HBD      | 3.04 |
|    |    |              |        | N46    | OD2-ASP214 | HBD      | 3.21 |
|    |    |              |        | O20    | NH1-ARG439 | HBA      | 2.84 |
|    |    |              |        | N46    | OD1-ASP214 | ionic    | 3.04 |
|    |    |              |        | N46    | OD2-ASP214 | ionic    | 3.21 |
| 49 | 78 | ZINC08435576 | -17.47 | N55    | OD1-ASP349 | HBD      | 2.94 |
|    |    |              |        | O13    | O-HOH1174  | HBA      | 2.54 |
|    |    |              |        | O54    | NE-ARG312  | ionic    | 2.71 |
|    |    |              |        | N55    | OD1-ASP349 | ionic    | 2.94 |
|    |    |              |        | N55    | OD2-ASP349 | ionic    | 2.98 |
| 50 | 79 | ZINC08438656 | -17.45 | O36    | NE2-HIS348 | HBA      | 3.19 |
|    |    |              |        | O43    | NE-ARG312  | ionic    | 2.86 |
|    |    |              |        | O43    | NH1-ARG312 | ionic    | 3.59 |
|    |    |              |        | O43    | NH2-ARG312 | ionic    | 2.98 |
|    |    |              |        | N57    | OD1-ASP349 | ionic    | 2.62 |
|    |    |              |        | N57    | OD2-ASP349 | ionic    | 3.03 |
| 51 | 82 | ZINC00626165 | -17.30 | N57    | OE1-GLU276 | HBD      | 3.12 |
|    |    |              |        | O12    | NE2-HIS348 | HBA      | 3.12 |
|    |    |              |        | O12    | O-HOH1026  | HBA      | 2.79 |
|    |    |              |        | N5     | OE2-GLU276 | ionic    | 3.81 |
|    |    |              |        | N5     | OD2-ASP349 | ionic    | 3.13 |
|    |    |              |        | N57    | OE1-GLU276 | ionic    | 3.12 |
|    |    |              |        | N57    | OE2-GLU276 | ionic    | 2.64 |
| 52 | 83 | ZINC00702307 | -17.29 | O27    | NE-ARG312  | ionic    | 2.83 |
|    |    |              |        | O27    | NH1-ARG312 | ionic    | 3.65 |
|    |    |              |        | O27    | NH2-ARG312 | ionic    | 3.64 |
|    |    |              |        | O54    | NE-ARG312  | ionic    | 3.85 |
| 53 | 84 | ZINC08438550 | -17.28 | O62    | NE-ARG312  | ionic    | 3.02 |
|    |    |              |        | O62    | NH2-ARG312 | ionic    | 3.72 |
|    |    |              |        | N63    | OD2-ASP349 | ionic    | 3.30 |
| 54 | 86 | ZINC08432903 | -17.23 | N57    | OE2-GLU276 | HBD      | 2.56 |
|    |    |              |        | N57    | OE1-GLU276 | ionic    | 3.66 |
|    |    |              |        | N57    | OE2-GLU276 | ionic    | 2.56 |
|    |    |              |        | N57    | OD2-ASP349 | ionic    | 3.48 |
|    |    |              |        | 6-ring | CE1-HIS239 | H- $\pi$ | 3.57 |
| 55 | 87 | ZINC00703050 | -17.23 | O34    | O-HOH1056  | HBA      | 2.27 |
|    |    |              |        | 6-ring | CD-ARG312  | H- $\pi$ | 3.80 |
| 56 | 89 | ZINC08440218 | -17.22 | N48    | OD1-ASP214 | HBD      | 3.04 |
|    |    |              |        | N43    | OD1-ASP349 | ionic    | 3.07 |
|    |    |              |        | N43    | OD2-ASP349 | ionic    | 3.16 |
|    |    |              |        | N48    | OD1-ASP214 | ionic    | 3.04 |
|    |    |              |        | N48    | OE1-GLU276 | ionic    | 3.65 |
|    |    |              |        | N48    | OD2-ASP349 | ionic    | 3.63 |
|    |    |              |        | O52    | NE-ARG312  | ionic    | 2.92 |
| 57 | 90 | ZINC08432475 | -17.19 | O52    | NH2-ARG312 | ionic    | 3.61 |
|    |    |              |        | N38    | OE1-GLU276 | HBD      | 2.87 |
|    |    |              |        | N38    | OD2-ASP349 | HBD      | 3.44 |
|    |    |              |        | O23    | O-HOH1056  | HBA      | 2.53 |
|    |    |              |        | N38    | OD1-ASP214 | ionic    | 3.38 |
|    |    |              |        | N38    | OE1-GLU276 | ionic    | 2.87 |
|    |    |              |        | N38    | OE2-GLU276 | ionic    | 3.06 |
| 58 | 91 | ZINC08442014 | -17.19 | N38    | OD2-ASP349 | ionic    | 3.44 |
|    |    |              |        | N58    | OE2-GLU304 | HBD      | 3.24 |
|    |    |              |        | O33    | O-HOH1026  | HBA      | 2.87 |
|    |    |              |        | N25    | OE2-GLU276 | ionic    | 3.86 |
|    |    |              |        | N25    | OD2-ASP349 | ionic    | 3.56 |
| 59 | 92 | ZINC00625761 | -17.18 | N60    | OD1-ASP349 | HBD      | 3.05 |
|    |    |              |        | N60    | OD1-ASP349 | ionic    | 3.05 |
|    |    |              |        | N60    | OD2-ASP349 | ionic    | 3.49 |
|    |    |              |        | 6-ring | O-HOH1102  | H- $\pi$ | 3.70 |
| 60 | 95 | ZINC17160093 | -17.11 | N51    | OD1-ASP214 | HBD      | 1.95 |
|    |    |              |        | N35    | OD2-ASP68  | ionic    | 3.51 |
|    |    |              |        | N51    | OD1-ASP214 | ionic    | 1.95 |
|    |    |              |        | N51    | OD2-ASP214 | ionic    | 2.48 |
| 61 | 96 | ZINC08435575 | -17.05 | N56    | OD1-ASP349 | HBD      | 3.75 |



|    |     |              |        |        |               |               |      |
|----|-----|--------------|--------|--------|---------------|---------------|------|
|    |     |              |        | O35    | O-HOH1056     | HBA           | 2.46 |
|    |     |              |        | N56    | OD1-ASP349    | ionic         | 3.75 |
| 62 | 97  | ZINC00857151 | -17.05 | N16    | OD1-ASP408    | HBD           | 3.36 |
|    |     |              |        | O13    | O-HOH1174     | HBA           | 2.46 |
| 63 | 99  | ZINC00983605 | -16.99 | N14    | OD2-ASP214    | HBD           | 1.97 |
|    |     |              |        | N14    | OG1-THR215    | HBA           | 1.68 |
|    |     |              |        | O17    | N-THR215      | HBA           | 2.01 |
| 64 | 100 | ZINC15952849 | -16.99 | O28    | NE-ARG439     | ionic         | 3.26 |
|    |     |              |        | O28    | NH1-ARG439    | ionic         | 3.13 |
| 65 | 101 | ZINC08437196 | -16.98 | N26    | OD2-ASP349    | HBD           | 3.29 |
|    |     |              |        | N23    | OD1-ASP214    | ionic         | 3.34 |
|    |     |              |        | N23    | OD2-ASP214    | ionic         | 3.03 |
|    |     |              |        | N26    | OE1-GLU276    | ionic         | 3.53 |
|    |     |              |        | N26    | OE2-GLU276    | ionic         | 3.23 |
|    |     |              |        | N26    | OD2-ASP349    | ionic         | 3.29 |
| 66 | 102 | ZINC00703108 | -16.96 | O22    | O-HOH1026     | HBA           | 2.53 |
|    |     |              |        | O30    | NE-ARG439     | ionic         | 2.90 |
|    |     |              |        | O30    | NH1-ARG439    | ionic         | 2.85 |
|    |     |              |        | O32    | NH2-ARG312    | ionic         | 3.72 |
| 67 | 104 | ZINC08435580 | -16.95 | O48    | NE-ARG312     | ionic         | 3.74 |
|    |     |              |        | N60    | OD2-ASP349    | ionic         | 3.83 |
|    |     |              |        | 6-ring | 6-ring-PHE157 | $\pi$ - $\pi$ | 3.76 |
| 68 | 105 | ZINC02159741 | -16.95 | O41    | NH1-ARG439    | HBA           | 2.70 |
|    |     |              |        | O41    | O-HOH1026     | HBA           | 2.73 |
|    |     |              |        | N49    | OD1-ASP214    | ionic         | 3.47 |
|    |     |              |        | N49    | OD2-ASP214    | ionic         | 3.67 |
|    |     |              |        | N49    | OE1-GLU276    | ionic         | 3.87 |
| 69 | 106 | ZINC08417536 | -16.94 | O40    | NE2-HIS279    | ionic         | 3.49 |
| 70 | 107 | ZINC09008533 | -16.94 | O26    | NE-ARG439     | ionic         | 3.22 |
|    |     |              |        | O26    | NH1-ARG439    | ionic         | 2.38 |
|    |     |              |        | O26    | NH2-ARG439    | ionic         | 3.28 |
|    |     |              |        | O44    | NE2-HIS279    | ionic         | 3.62 |
| 71 | 108 | ZINC08441623 | -16.83 | ---    |               |               |      |
| 72 | 109 | ZINC08441892 | -16.92 | N64    | OD1-ASP349    | HBD           | 2.38 |
|    |     |              |        | N29    | NE2-HIS348    | HBA           | 3.03 |
|    |     |              |        | N62    | OE1-GLU276    | ionic         | 3.99 |
|    |     |              |        | N64    | OD1-ASP349    | ionic         | 2.38 |
|    |     |              |        | N64    | OD2-ASP349    | ionic         | 3.52 |
| 73 | 111 | ZINC08437653 | -16.88 | N53    | OE1-GLU276    | HBD           | 2.82 |
|    |     |              |        | O46    | NE2-HIS348    | HBA           | 2.44 |
|    |     |              |        | N53    | OD1-ASP214    | ionic         | 2.56 |
|    |     |              |        | N53    | OD2-ASP214    | ionic         | 3.49 |
|    |     |              |        | N53    | OE1-GLU276    | ionic         | 2.82 |
|    |     |              |        | N53    | OE2-GLU276    | ionic         | 3.52 |
| 74 | 112 | ZINC08996455 | -16.86 | N62    | OD1-ASP349    | HBD           | 3.22 |
|    |     |              |        | N62    | OD2-ASP349    | HBD           | 2.92 |
|    |     |              |        | N62    | OD1-ASP349    | ionic         | 3.22 |
|    |     |              |        | N62    | OD2-ASP349    | ionic         | 2.92 |
| 75 | 113 | ZINC00832890 | -16.86 | N36    | O-HOH1228     | HBD           | 2.73 |
| 76 | 117 | ZINC06144561 | -16.83 | N44    | O-HOH1228     | HBD           | 2.19 |
|    |     |              |        | O43    | O-HOH1174     | HBA           | 2.36 |
|    |     |              |        | N15    | OD2-ASP349    | ionic         | 3.99 |
| 77 | 120 | ZINC08435579 | -16.80 | O40    | O-HOH1026     | HBA           | 2.43 |
|    |     |              |        | N61    | OD1-ASP214    | ionic         | 3.93 |
|    |     |              |        | N61    | OD2-ASP214    | ionic         | 3.86 |
| 78 | 123 | ZINC00625713 | -16.77 | N66    | OE1-GLU276    | HBD           | 2.27 |
|    |     |              |        | O52    | NE2-HIS348    | HBA           | 3.20 |
|    |     |              |        | O52    | O-HOH1026     | HBA           | 2.88 |
|    |     |              |        | N31    | OE1-GLU276    | ionic         | 3.43 |
|    |     |              |        | N31    | OE2-GLU276    | ionic         | 3.36 |
|    |     |              |        | N50    | OD1-ASP214    | ionic         | 3.24 |
|    |     |              |        | N50    | OE1-GLU276    | ionic         | 3.69 |
|    |     |              |        | N50    | OD2-ASP349    | ionic         | 3.58 |
|    |     |              |        | N66    | OD2-ASP214    | ionic         | 3.98 |
|    |     |              |        | N66    | OE1-GLU276    | ionic         | 2.27 |
|    |     |              |        | N66    | OE2-GLU276    | ionic         | 2.61 |
| 79 | 124 | ZINC08441947 | -16.77 | N57    | OD1-ASP349    | ionic         | 3.49 |
| 80 | 125 | ZINC08897821 | -16.76 | N28    | OD1-ASP349    | ionic         | 3.17 |
|    |     |              |        | N28    | OD2-ASP349    | ionic         | 2.86 |
|    |     |              |        | N33    | OD1-ASP68     | ionic         | 3.56 |
|    |     |              |        | N33    | OD1-ASP349    | ionic         | 3.26 |
|    |     |              |        | O37    | NE-ARG312     | ionic         | 2.30 |
|    |     |              |        | O37    | NH2-ARG312    | ionic         | 3.18 |
|    |     |              |        | 5-ring | CD-ARG312     | H- $\pi$      | 3.74 |
|    |     |              |        | 5-ring | NE2-HIS348    | H- $\pi$      | 3.80 |



|    |     |              |        |        |               |               |      |
|----|-----|--------------|--------|--------|---------------|---------------|------|
| 81 | 127 | ZINC09046651 | 16.71  | O26    | O-HOH1174     | HBA           | 2.06 |
|    |     |              |        | O44    | NE2-HIS348    | HBA           | 2.85 |
|    |     |              |        | N51    | OD1-ASP214    | ionic         | 3.63 |
|    |     |              |        | N51    | OD2-ASP214    | ionic         | 3.86 |
|    |     |              |        | 6-ring | 6-ring-PHE157 | $\pi$ - $\pi$ | 3.84 |
| 82 | 129 | ZINC08432386 | 16.70  | N22    | O-HOH1174     | HBA           | 2.71 |
|    |     |              |        | O45    | NE-ARG312     | ionic         | 2.28 |
|    |     |              |        | O45    | NH2-ARG312    | ionic         | 3.49 |
| 83 | 130 | ZINC17163315 | -16.69 | O11    | NH1-ARG439    | HBA           | 3.11 |
|    |     |              |        | O11    | O-HOH1026     | HBA           | 2.57 |
|    |     |              |        | O24    | O-HOH1174     | HBA           | 2.73 |
| 84 | 131 | ZINC00711757 | -16.69 | O14    | OD2-ASP68     | HBD           | 2.56 |
| 85 | 132 | ZINC08440772 | -16.66 | O27    | NE-ARG439     | ionic         | 1.57 |
|    |     |              |        | O27    | NH1-ARG439    | ionic         | 0.80 |
|    |     |              |        | O27    | NH2-ARG439    | ionic         | 1.92 |
|    |     |              |        | O27    | NH2-ARG443    | ionic         | 3.51 |
|    |     |              |        | O50    | NE-ARG439     | ionic         | 3.65 |
|    |     |              |        | O50    | NH1-ARG439    | ionic         | 3.63 |
| 86 | 133 | ZINC08441928 | -16.65 | 5-ring | 6-ring-PHE177 | $\pi$ - $\pi$ | 3.89 |
|    |     |              |        | N53    | OE1-GLU276    | HBD           | 2.65 |
|    |     |              |        | N53    | NH1-ARG212    | HBA           | 3.56 |
|    |     |              |        | N61    | OD1-ASP68     | ionic         | 2.81 |
| 87 | 134 | ZINC20032743 | -16.63 | N61    | OD2-ASP68     | ionic         | 2.73 |
|    |     |              |        | N22    | OD1-ASP349    | HBD           | 2.93 |
|    |     |              |        | N26    | OD1-ASP349    | HBD           | 3.37 |
|    |     |              |        | N26    | OD1-ASP349    | ionic         | 3.37 |
| 88 | 135 | ZINC08414138 | -16.62 | N26    | OD2-ASP349    | ionic         | 3.08 |
|    |     |              |        | N74    | OE2-GLU276    | HBD           | 3.50 |
|    |     |              |        | N74    | OE2-GLU276    | ionic         | 3.50 |
|    |     |              |        |        |               |               |      |
| 89 | 137 | ZINC08897821 | -16.61 | O34    | O-HOH1058     | HBA           | 3.18 |
|    |     |              |        | O30    | NE-ARG312     | ionic         | 2.81 |
|    |     |              |        | O30    | NH2-ARG312    | ionic         | 2.75 |
|    |     |              |        | N45    | OD1-ASP214    | ionic         | 3.42 |
|    |     |              |        | N52    | OD2-ASP68     | ionic         | 3.39 |
|    |     |              |        | N52    | OD1-ASP214    | ionic         | 3.60 |
| 90 | 138 | ZINC01413485 | -16.57 | O38    | NE-ARG439     | ionic         | 3.64 |
|    |     |              |        | O38    | NH1-ARG439    | ionic         | 3.61 |
|    |     |              |        | O40    | NE-ARG439     | ionic         | 3.43 |
| 91 | 139 | ZINC08411504 | -16.55 | N30    | NE-ARG312     | HBA           | 3.64 |
|    |     |              |        | N46    | OD1-ASP349    | ionic         | 2.90 |
|    |     |              |        | N46    | OD2-ASP349    | ionic         | 2.93 |
| 92 | 140 | ZINC05286115 | -16.55 | N37    | O-HOH1102     | HBD           | 2.44 |
|    |     |              |        | N39    | OE1-GLU276    | HBD           | 2.00 |
|    |     |              |        | N5     | OD1-ASP408    | ionic         | 3.57 |
|    |     |              |        | N32    | OD1-ASP214    | ionic         | 2.59 |
|    |     |              |        | N32    | OD2-ASP214    | ionic         | 3.31 |
|    |     |              |        | N39    | OD1-ASP214    | ionic         | 2.57 |
|    |     |              |        | N39    | OD2-ASP214    | ionic         | 3.00 |
|    |     |              |        | N39    | OE1-GLU276    | ionic         | 2.00 |
|    |     |              |        | N39    | OE2-GLU276    | ionic         | 3.18 |
| 93 | 141 | ZINC08433219 | -16.52 | N67    | OD2-ASP349    | HBD           | 2.95 |
|    |     |              |        | O57    | O-HOH1026     | HBA           | 2.21 |
|    |     |              |        | N67    | OD1-ASP349    | ionic         | 3.50 |
|    |     |              |        | N67    | OD2-ASP349    | ionic         | 2.95 |
|    |     |              |        | 6-ring | CE2-PHE300    | H- $\pi$      | 3.66 |
| 94 | 143 | ZINC00683816 | -16.47 | N34    | OD1-ASP214    | HBD           | 1.74 |
|    |     |              |        | N34    | OD2-ASP214    | HBD           | 1.95 |
|    |     |              |        | N38    | OD2-ASP68     | HBD           | 1.76 |
|    |     |              |        | S37    | NE2-HIS111    | HBA           | 2.03 |
|    |     |              |        | O14    | O-HOH1174     | HBA           | 1.93 |
|    |     |              |        | O33    | O-HOH1102     | HBA           | 2.46 |
| 95 | 144 | ZINC00292755 | -16.46 | N37    | OE2-GLU276    | ionic         | 2.87 |
| 96 | 145 | ZINC01414766 | -16.46 | O31    | NE-ARG312     | HBA           | 3.13 |
|    |     |              |        | O27    | NH1-ARG439    | ionic         | 3.65 |
|    |     |              |        | O27    | NH2-ARG439    | ionic         | 3.49 |
|    |     |              |        | O29    | NE-ARG439     | ionic         | 2.46 |
|    |     |              |        | O29    | NH1-ARG439    | ionic         | 3.42 |
| 97 | 146 | ZINC06444803 | -16.46 | N5     | OD2-ASP349    | ionic         | 3.62 |
|    |     |              |        | N16    | NH1-ARG439    | ionic         | 3.87 |
|    |     |              |        | N53    | OD2-ASP349    | ionic         | 3.77 |
|    |     |              |        | 6-ring | 5-ring HIS239 | $\pi$ - $\pi$ | 3.71 |
| 98 | 147 | ZINC08427102 | -16.45 | N53    | OE1-GLU276    | HBD           | 2.28 |
|    |     |              |        | N53    | OD1-ASP214    | ionic         | 3.70 |
|    |     |              |        | N53    | OD2-ASP214    | ionic         | 3.73 |
|    |     |              |        | N53    | OE1-GLU276    | ionic         | 2.28 |



|     |     |              |        |        |               |               |      |
|-----|-----|--------------|--------|--------|---------------|---------------|------|
|     |     |              |        | N53    | OE2-GLU276    | ionic         | 2.75 |
|     |     |              |        | N55    | OD1-ASP68     | ionic         | 2.12 |
|     |     |              |        | N55    | OD2-ASP68     | ionic         | 1.02 |
|     |     |              |        |        |               |               |      |
| 99  | 148 | ZINC17160090 | -16.41 | O21    | O-HOH1056     | HBA           | 2.69 |
|     |     |              |        | O50    | NE-ARG439     | ionic         | 1.79 |
|     |     |              |        | O50    | NH1-ARG439    | ionic         | 1.30 |
|     |     |              |        | O50    | NH2-ARG439    | ionic         | 2.57 |
|     |     |              |        | 5-ring | CB-ARG312     | H- $\pi$      | 3.79 |
| 100 | 149 | ZINC08438781 | -16.40 | O13    | NE-ARG312     | ionic         | 3.41 |
|     |     |              |        | O51    | NE-ARG312     | ionic         | 2.59 |
|     |     |              |        | O51    | NH1-ARG312    | ionic         | 3.60 |
|     |     |              |        | O51    | NH2-ARG312    | ionic         | 2.37 |
|     |     |              |        | N52    | OE2-GLU276    | ionic         | 3.75 |
|     |     |              |        | N52    | OD1-ASP349    | ionic         | 2.81 |
|     |     |              |        | N52    | OD2-ASP349    | ionic         | 2.02 |
| 101 | 150 | ZINC08439872 | -16.39 | N44    | OD2-ASP349    | HBD           | 2.35 |
|     |     |              |        | N5     | OD1-ASP349    | ionic         | 3.23 |
|     |     |              |        | N5     | OD2-ASP349    | ionic         | 2.93 |
|     |     |              |        | N44    | OD1-ASP349    | ionic         | 2.94 |
|     |     |              |        | N44    | OD2-ASP349    | ionic         | 2.35 |
| 102 | 152 | ZINC19989886 | -16.36 | S33    | N-ARG312      | HBA           | 2.82 |
|     |     |              |        | N8     | OD1-ASP349    | ionic         | 3.82 |
|     |     |              |        | N8     | OD2-ASP349    | ionic         | 3.68 |
| 103 | 153 | ZINC08441926 | -16.36 | N61    | OE2-GLU276    | HBD           | 3.15 |
|     |     |              |        | N50    | NE2-HIS348    | HBA           | 2.16 |
|     |     |              |        | N50    | O-HOH1026     | HBA           | 2.77 |
|     |     |              |        | N52    | O-HOH1087     | HBA           | 2.08 |
|     |     |              |        | N59    | OD1-ASP68     | ionic         | 3.83 |
|     |     |              |        | N59    | OD2-ASP68     | ionic         | 2.27 |
|     |     |              |        | N61    | OD1-ASP214    | ionic         | 2.61 |
|     |     |              |        | N61    | OD2-ASP214    | ionic         | 3.42 |
|     |     |              |        | N61    | OE1-GLU276    | ionic         | 2.31 |
|     |     |              |        | N61    | OE2-GLU276    | ionic         | 3.15 |
| 104 | 154 | ZINC08432384 | -16.36 | N21    | O-HOH1174     | HBD           | 1.87 |
|     |     |              |        | N55    | OD1-ASP408    | HBD           | 3.43 |
|     |     |              |        | N55    | O-HOH1228     | HBD           | 2.46 |
|     |     |              |        | O10    | ND2-ASN241    | HBA           | 2.66 |
|     |     |              |        | N55    | OD1-ASP408    | ionic         | 3.43 |
| 105 | 157 | ZINC08414555 | -16.34 | N58    | O-HOH1102     | HBD           | 2.44 |
|     |     |              |        | O29    | NE-ARG312     | HBA           | 3.04 |
|     |     |              |        | N58    | OD1-ASP349    | ionic         | 2.39 |
|     |     |              |        | N58    | OD2-ASP349    | ionic         | 2.41 |
| 106 | 159 | ZINC00646487 | -16.31 | ---    |               |               |      |
| 107 | 160 | ZINC09046768 | -16.31 | O58    | NE2-HIS348    | HBA           | 2.30 |
|     |     |              |        | N65    | OD1-ASP214    | ionic         | 2.99 |
|     |     |              |        | N65    | OD2-ASP214    | ionic         | 3.58 |
|     |     |              |        | N65    | OE1-GLU276    | ionic         | 3.89 |
| 108 | 162 | ZINC00692735 | -16.30 | O36    | NH2-ARG212    | HBA           | 3.57 |
|     |     |              |        | O51    | NE2-HIS279    | ionic         | 3.53 |
|     |     |              |        | O52    | ND1-HIS279    | ionic         | 3.71 |
|     |     |              |        | O52    | NE2-HIS279    | ionic         | 3.25 |
| 109 | 163 | ZINC02162053 | -16.29 | O28    | OD1-ASP349    | HBD           | 2.80 |
| 110 | 165 | ZINC08441462 | -16.28 | O47    | O-HOH1056     | HBA           | 2.35 |
|     |     |              |        | O45    | NH2-ARG312    | ionic         | 3.76 |
| 111 | 166 | ZINC08437911 | -16.28 | N33    | OE2-GLU276    | ionic         | 2.86 |
|     |     |              |        | N33    | OD2-ASP349    | ionic         | 3.41 |
| 112 | 167 | ZINC01795564 | -16.27 | O26    | OE1-GLU276    | HBD           | 1.64 |
|     |     |              |        | O26    | OE2-GLU276    | HBD           | 1.68 |
|     |     |              |        | O26    | NH2-ARG212    | HBA           | 1.64 |
|     |     |              |        | N15    | OD1-ASP349    | ionic         | 3.58 |
|     |     |              |        | N15    | OD2-ASP349    | ionic         | 3.22 |
| 113 | 168 | ZINC01413497 | -16.27 | N34    | OD2-ASP349    | HBD           | 2.69 |
|     |     |              |        | O57    | NE-ARG312     | ionic         | 3.22 |
|     |     |              |        | O57    | NH1-ARG312    | ionic         | 3.49 |
|     |     |              |        | O57    | NH2-ARG312    | ionic         | 3.57 |
| 114 | 169 | ZINC08429897 | -16.26 | N22    | O-HOH1228     | HBD           | 2.94 |
|     |     |              |        | N42    | OD2-ASP68     | ionic         | 3.58 |
|     |     |              |        | N42    | OD2-ASP214    | ionic         | 3.94 |
| 115 | 171 | ZINC08437218 | -16.24 | N15    | O-HOH1228     | HBD           | 2.03 |
|     |     |              |        | N23    | OD1-ASP349    | HBD           | 3.27 |
|     |     |              |        | O18    | O-HOH1174     | HBA           | 2.61 |
|     |     |              |        | N23    | OD1-ASP349    | ionic         | 3.27 |
|     |     |              |        | 6-ring | 6-ring-PHE157 | $\pi$ - $\pi$ | 3.62 |
| 116 | 172 | ZINC00665548 | -16.24 | ---    |               |               |      |
| 117 | 173 | ZINC08437199 | -16.24 | O52    | NE-ARG312     | ionic         | 1.66 |



|     |     |              |        |        |              |          |      |
|-----|-----|--------------|--------|--------|--------------|----------|------|
|     |     |              |        | O52    | NH1-ARG312   | ionic    | 2.39 |
|     |     |              |        | O52    | NH2-ARG312   | ionic    | 2.18 |
| 118 | 174 | ZINC00702987 | -16.22 | ---    |              |          |      |
| 119 | 175 | ZINC00630492 | -16.21 | ---    |              |          |      |
| 120 | 177 | ZINC08441601 | -16.18 | ---    |              |          |      |
| 121 | 178 | ZINC02067899 | -16.18 | O14    | O-HOH1228    | HBD      | 1.82 |
|     |     |              |        | S24    | NE-ARG312    | ionic    | 3.15 |
|     |     |              |        | S24    | NH1-ARG312   | ionic    | 2.07 |
|     |     |              |        | S24    | NH2-ARG312   | ionic    | 2.17 |
| 122 | 179 | ZINC08430546 | -16.17 | O44    | NE2-HIS348   | HBA      | 2.19 |
|     |     |              |        | N51    | OD1-ASP349   | ionic    | 3.68 |
|     |     |              |        | N51    | OD2-ASP349   | ionic    | 3.21 |
| 123 | 180 | ZINC08431354 | -16.17 | N53    | OE1-GLU276   | HBD      | 3.32 |
|     |     |              |        | N53    | OE1-GLU276   | ionic    | 3.32 |
|     |     |              |        | N53    | OE2-GLU276   | ionic    | 3.17 |
| 124 | 181 | ZINC00984875 | -16.15 | N28    | OD2-ASP349   | HBD      | 2.77 |
|     |     |              |        | O8     | O-HOH1056    | HBA      | 2.44 |
|     |     |              |        | O27    | NE2-HIS348   | HBA      | 3.13 |
| 125 | 182 | ZINC02479986 | -16.12 | N16    | O-HOH1228    | HBD      | 2.37 |
|     |     |              |        | N46    | OE2-GLU276   | ionic    | 3.92 |
|     |     |              |        | N46    | OD2-ASP349   | ionic    | 3.45 |
| 126 | 183 | ZINC08441602 | -16.12 | O38    | NE-ARG312    | ionic    | 3.00 |
|     |     |              |        | O38    | NH2-ARG312   | ionic    | 3.82 |
| 127 | 184 | ZINC00702427 | -16.11 | O25    | NE-ARG312    | HBA      | 2.53 |
|     |     |              |        | O27    | NE-ARG439    | ionic    | 2.95 |
|     |     |              |        | O27    | NH1-ARG439   | ionic    | 3.84 |
|     |     |              |        | O56    | NE-ARG439    | ionic    | 3.60 |
|     |     |              |        | O56    | NH1-ARG439   | ionic    | 3.12 |
|     |     |              |        | O56    | NH2-ARG439   | ionic    | 3.59 |
| 128 | 185 | ZINC08414444 | -16.11 | N62    | OD1-ASP349   | HBD      | 3.46 |
|     |     |              |        | N62    | OD1-ASP349   | ionic    | 3.46 |
|     |     |              |        | N62    | OD2-ASP349   | ionic    | 3.59 |
| 129 | 186 | ZINC06144543 | -16.08 | N12    | OD1-ASP349   | HBD      | 2.46 |
|     |     |              |        | O26    | NH2-ARG212   | HBA      | 2.14 |
|     |     |              |        | N12    | OD1-ASP349   | ionic    | 2.46 |
|     |     |              |        | N12    | OD2-ASP349   | ionic    | 2.76 |
| 130 | 187 | ZINC08411455 | -16.08 | N47    | OE2-GLU276   | HBD      | 2.33 |
|     |     |              |        | N45    | OD2-ASP68    | ionic    | 3.42 |
|     |     |              |        | N47    | OE1-GLU276   | ionic    | 3.50 |
|     |     |              |        | N47    | OE2-GLU276   | ionic    | 2.33 |
| 131 | 188 | ZINC08429898 | -16.06 | N42    | OD1-ASP214   | ionic    | 2.90 |
|     |     |              |        | N42    | OD2-ASP349   | ionic    | 3.65 |
| 132 | 190 | ZINC01952505 | -16.05 | N18    | NE-ARG439    | ionic    | 3.33 |
|     |     |              |        | N18    | NH1-ARG439   | ionic    | 3.01 |
|     |     |              |        | N20    | OD1-ASP349   | ionic    | 3.30 |
|     |     |              |        | N40    | OD1-ASP349   | ionic    | 3.43 |
|     |     |              |        | N40    | OD2-ASP349   | ionic    | 3.36 |
| 133 | 191 | ZINC08433001 | -16.05 | N58    | OD1-ASP214   | HBD      | 3.39 |
|     |     |              |        | O39    | NH1-ARG439   | HBA      | 2.06 |
|     |     |              |        | N58    | OD1-ASP214   | ionic    | 3.39 |
| 134 | 192 | ZINC08425651 | -16.04 | N47    | OD1-ASP349   | HBD      | 1.75 |
|     |     |              |        | N29    | O-HOH1026    | HBA      | 2.27 |
|     |     |              |        | N45    | OE2-GLU276   | ionic    | 3.66 |
|     |     |              |        | N47    | OD1-ASP349   | ionic    | 1.75 |
|     |     |              |        | N47    | OD2-ASP349   | ionic    | 3.29 |
| 135 | 194 | ZINC05919492 | -16.02 | N42    | OE2-GLU276   | HBD      | 2.27 |
|     |     |              |        | N44    | OD2-ASP68    | HBD      | 1.92 |
|     |     |              |        | N28    | NE2-HIS348   | HBA      | 2.81 |
|     |     |              |        | N42    | OE1-GLU276   | ionic    | 3.47 |
|     |     |              |        | N42    | OE2-GLU276   | ionic    | 3.18 |
|     |     |              |        | N44    | OD1-ASP68    | ionic    | 3.72 |
|     |     |              |        | N44    | OD2-ASP68    | ionic    | 2.94 |
| 136 | 195 | ZINC08436971 | -16.01 | N53    | OD2-ASP68    | ionic    | 3.77 |
|     |     |              |        | N53    | OD1-ASP214   | ionic    | 3.82 |
| 137 | 196 | ZINC08817408 | -15.99 | N47    | OD1-ASP214   | HBD      | 2.52 |
|     |     |              |        | N47    | OD1-ASP214   | ionic    | 2.52 |
|     |     |              |        | N47    | OD2-ASP214   | ionic    | 3.66 |
|     |     |              |        | C5     | 6-ring TYR71 | H-II     | 3.05 |
| 138 | 197 | ZINC08411308 | -15.98 | N36    | NE2-HIS348   | HBA      | 3.74 |
|     |     |              |        | N52    | OD1-ASP349   | ionic    | 2.09 |
|     |     |              |        | N52    | OD2-ASP349   | ionic    | 2.51 |
|     |     |              |        | 6-ring | O-HOH1174    | H- $\pi$ | 3.80 |
| 139 | 199 | ZINC08427099 | -15.96 | N47    | OD1-ASP349   | HBD      | 2.15 |
|     |     |              |        | N47    | OD1-ASP349   | ionic    | 2.15 |



|                                                                                               |     |              |        |        |               |               |      |
|-----------------------------------------------------------------------------------------------|-----|--------------|--------|--------|---------------|---------------|------|
|                                                                                               |     |              |        | N47    | OD2-ASP349    | ionic         | 2.89 |
| 140                                                                                           | 200 | ZINC08437082 | -15.95 | N11    | OD2-ASP349    | HBD           | 2.00 |
|                                                                                               |     |              |        | N15    | OD1-ASP214    | HBD           | 1.59 |
|                                                                                               |     |              |        | O22    | OD1-ASP214    | HBD           | 2.40 |
|                                                                                               |     |              |        | O22    | OD2-ASP214    | HBD           | 1.46 |
|                                                                                               |     |              |        | O14    | NH2-ARG212    | HBA           | 1.97 |
|                                                                                               |     |              |        | O14    | NE2-HIS348    | HBA           | 2.17 |
|                                                                                               |     |              |        |        |               |               |      |
| 141                                                                                           | 201 | ZINC08437193 | -15.93 | N23    | OD2-ASP214    | ionic         | 3.61 |
|                                                                                               |     |              |        | N23    | OE1-GLU276    | ionic         | 3.27 |
|                                                                                               |     |              |        | N23    | OE2-GLU276    | ionic         | 3.98 |
|                                                                                               |     |              |        | C53    | 6-ring-PHE177 | H- $\pi$      | 3.88 |
|                                                                                               |     |              |        | 5-ring | O-HOH1102     | H- $\pi$      | 3.87 |
|                                                                                               |     |              |        | 6-ring | 5-ring HIS279 | $\pi$ - $\pi$ | 3.59 |
|                                                                                               |     |              |        |        |               |               |      |
| 142                                                                                           | 202 | ZINC08417802 | -15.93 | N39    | OD2-ASP349    | HBD           | 2.43 |
|                                                                                               |     |              |        | O38    | NE2-HIS348    | HBA           | 2.50 |
|                                                                                               |     |              |        | 6-ring | N-ARG312      | H- $\pi$      | 4.70 |
|                                                                                               |     |              |        |        |               |               |      |
| LA = Ligand atom, RA = Receptor atom, HBD = Hydrogen Bond Donor, HBA = Hydrogen Bond Acceptor |     |              |        |        |               |               |      |



**Table S3. 3D-structures of selected (eight) Hits.**

| S. No. | 3D-Structures                                                                                                                              |
|--------|--------------------------------------------------------------------------------------------------------------------------------------------|
| 1      | 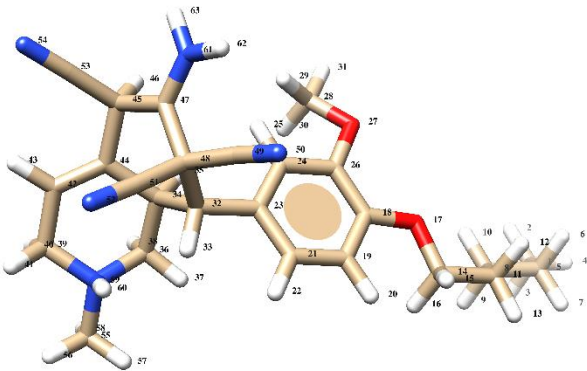 <p style="text-align: center;"><b>Compound 20</b></p>   |
| 2      |  <p style="text-align: center;"><b>Compound 28</b></p>   |
| 3      |  <p style="text-align: center;"><b>Compound 48</b></p> |
| 4      |                                                        |



|   |                     |
|---|---------------------|
|   | <b>Compound 63</b>  |
| 5 |                     |
| 6 | <b>Compound 94</b>  |
|   |                     |
| 7 | <b>Compound 112</b> |
|   |                     |
| 8 | <b>Compound 135</b> |



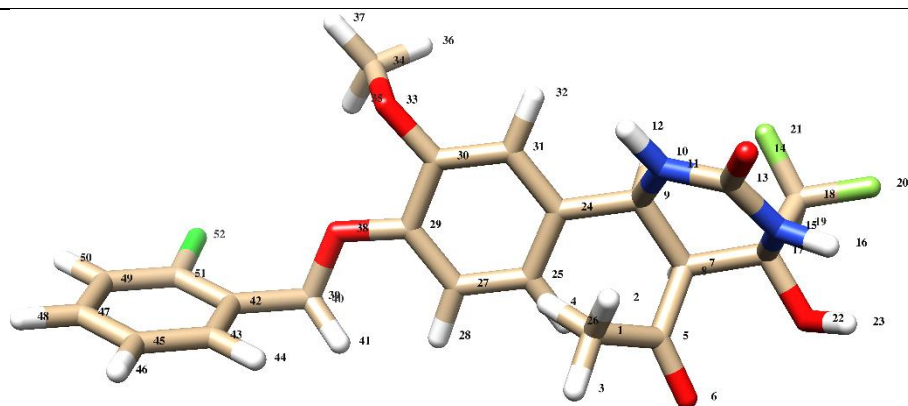

**Compound 140**



**Table S4. The predicted activities of thirty-two compounds (Test set 2)**

| S. No. | Compound codes in Article | Structure                                                                           | IC <sub>50</sub> ± SEM (μM) | pIC <sub>50</sub> | Predicted Activity | Residual | Reference                                                                                                                                                                                                                                                                                                                                                                                                               |
|--------|---------------------------|-------------------------------------------------------------------------------------|-----------------------------|-------------------|--------------------|----------|-------------------------------------------------------------------------------------------------------------------------------------------------------------------------------------------------------------------------------------------------------------------------------------------------------------------------------------------------------------------------------------------------------------------------|
| 1      | 3b                        | 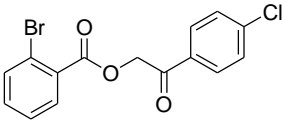   | 381.7                       | 3.42              | 3.21               | 0.21     | I. Khan, A. Khan, S.A. Halim, et al., Utilization of the common functional groups in bioactive molecules: Exploring dual inhibitory potential and computational analysis of keto esters against α-glucosidase and carbonic anhydrase-II enzymes, International Journal of Biological Macromolecules (2018), <a href="https://doi.org/10.1016/j.ijbiomac.2020.11.170">https://doi.org/10.1016/j.ijbiomac.2020.11.170</a> |
| 2      | 3c                        |    | 12.4                        | 4.91              | 4.68               | 0.23     |                                                                                                                                                                                                                                                                                                                                                                                                                         |
| 3      | 3d                        |    | 76.5                        | 4.12              | 4.00               | 0.12     |                                                                                                                                                                                                                                                                                                                                                                                                                         |
| 4      | 3e                        |    | 112.4                       | 3.95              | 3.70               | 0.25     |                                                                                                                                                                                                                                                                                                                                                                                                                         |
| 5      | 3f                        |   | 28.0                        | 4.55              | 4.25               | 0.30     |                                                                                                                                                                                                                                                                                                                                                                                                                         |
| 6      | 3g                        |  | 34.1                        | 4.47              | 4.37               | 0.10     |                                                                                                                                                                                                                                                                                                                                                                                                                         |
| 7      | 3h                        |  | 33.9                        | 4.47              | 4.95               | -0.48    |                                                                                                                                                                                                                                                                                                                                                                                                                         |



|    |    |                                                                                     |       |      |      |       |                                                                                                                                                                                                                                                                                                                                              |
|----|----|-------------------------------------------------------------------------------------|-------|------|------|-------|----------------------------------------------------------------------------------------------------------------------------------------------------------------------------------------------------------------------------------------------------------------------------------------------------------------------------------------------|
| 8  | 3i | 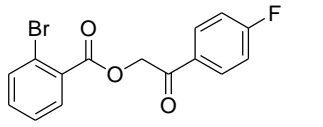    | 168.8 | 3.77 | 3.98 | -0.21 |                                                                                                                                                                                                                                                                                                                                              |
| 9  | 3  |    | 56.8  | 4.24 | 4.10 | 0.14  | N. Ur Rahman, S. A. Halim, M. Al-Azri et al., Triterpenic Acids as Non-Competitive $\alpha$ -Glucosidase Inhibitors from <i>Boswellia elongata</i> with Structure-Activity Relationship: In Vitro and In Silico Studies, <i>Biomolecules</i> (2020), <a href="https://doi.org/10.3390/biom10050751">https://doi.org/10.3390/biom10050751</a> |
| 10 | 4  |    | 9.9   | 5.00 | 5.01 | -0.01 |                                                                                                                                                                                                                                                                                                                                              |
| 11 | 5  |   | 20.9  | 4.68 | 4.29 | 0.39  |                                                                                                                                                                                                                                                                                                                                              |
| 12 | 11 |  | 14.9  | 4.83 | 4.91 | -0.08 |                                                                                                                                                                                                                                                                                                                                              |



|    |   |                                                                                     |        |      |      |       |                                                                                                                                                                                                                                        |
|----|---|-------------------------------------------------------------------------------------|--------|------|------|-------|----------------------------------------------------------------------------------------------------------------------------------------------------------------------------------------------------------------------------------------|
| 13 | 1 | 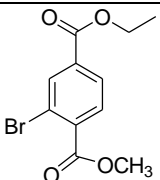    | 522.0  | 3.28 | 3.18 | 0.10  | N. Ur Rahman, K. Rafiq, A. Khan et al., $\alpha$ -Glucosidase Inhibition and Molecular Docking Studies of Natural Brominated Metabolites from Marine Macro Brown Alga Dictyopteris hoytii, Marine Drugs (2019), doi:10.3390/md17120666 |
| 14 | 2 |    | 234.2  | 3.63 | 3.60 | 0.03  |                                                                                                                                                                                                                                        |
| 15 | 3 |    | 289.4  | 3.54 | 3.69 | -0.15 |                                                                                                                                                                                                                                        |
| 16 | 6 |    | 659.78 | 3.18 | 3.50 | -0.32 |                                                                                                                                                                                                                                        |
| 17 | 7 |   | 30.5   | 4.52 | 4.19 | 0.33  |                                                                                                                                                                                                                                        |
| 18 | 8 |  | 480.1  | 3.32 | 3.82 | -0.50 |                                                                                                                                                                                                                                        |



|    |           |                                                                                     |       |      |      |       |                                                                                                                                                                                                                                                                                                            |
|----|-----------|-------------------------------------------------------------------------------------|-------|------|------|-------|------------------------------------------------------------------------------------------------------------------------------------------------------------------------------------------------------------------------------------------------------------------------------------------------------------|
| 19 | <b>8a</b> | 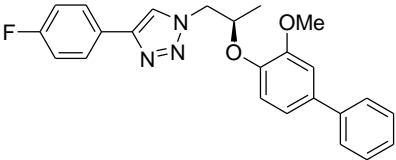    | 193.7 | 3.71 | 4.17 | -0.46 | S. K. Avula, A. Khan, S. A. Halim, et al.,<br>Synthesis of novel (R)-4-fluorophenyl-1H-<br>1,2,3-triazoles: A new class of $\alpha$ -<br>glucosidase inhibitors, Bioorganic<br>Chemistry (2019)<br><a href="https://doi.org/10.1016/j.bioorg.2019.103182">https://doi.org/10.1016/j.bioorg.2019.103182</a> |
| 20 | <b>8b</b> |    | 84.2  | 4.07 | 4.56 | -0.49 |                                                                                                                                                                                                                                                                                                            |
| 21 | <b>8c</b> |    | 66.8  | 4.17 | 4.58 | -0.41 |                                                                                                                                                                                                                                                                                                            |
| 22 | <b>8d</b> |    | 59.5  | 4.23 | 4.00 | 0.23  |                                                                                                                                                                                                                                                                                                            |
| 23 | <b>8e</b> |   | 48.6  | 4.31 | 3.78 | 0.53  |                                                                                                                                                                                                                                                                                                            |
| 24 | <b>8f</b> |  | 43.7  | 4.36 | 4.91 | -0.55 |                                                                                                                                                                                                                                                                                                            |



|    |           |                                                                                     |       |      |      |       |
|----|-----------|-------------------------------------------------------------------------------------|-------|------|------|-------|
| 25 | <b>8g</b> | 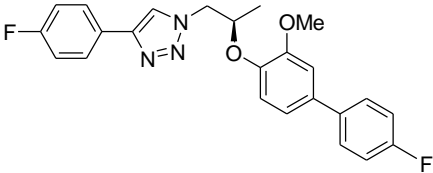    | 37.6  | 4.42 | 4.33 | 0.09  |
| 26 | <b>8h</b> |    | 40.18 | 4.40 | 4.15 | 0.25  |
| 27 | <b>8i</b> |    | 57.0  | 4.24 | 4.79 | -0.55 |
| 28 | <b>8j</b> |    | 44.3  | 4.35 | 3.99 | 0.36  |
| 29 | <b>8k</b> |  | 21.7  | 4.66 | 4.78 | -0.12 |
| 30 | <b>8l</b> |  | 17.9  | 4.75 | 4.32 | 0.43  |



|    |           |                                                                                   |      |      |      |       |  |
|----|-----------|-----------------------------------------------------------------------------------|------|------|------|-------|--|
| 31 | <b>8m</b> | 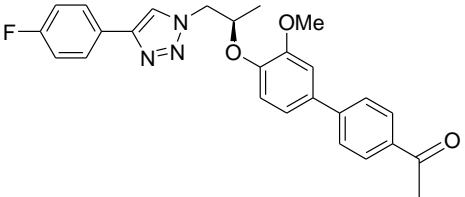  | 29.5 | 4.53 | 4.56 | -0.03 |  |
| 32 | <b>8n</b> |  | 23.9 | 4.62 | 5.01 | -0.39 |  |



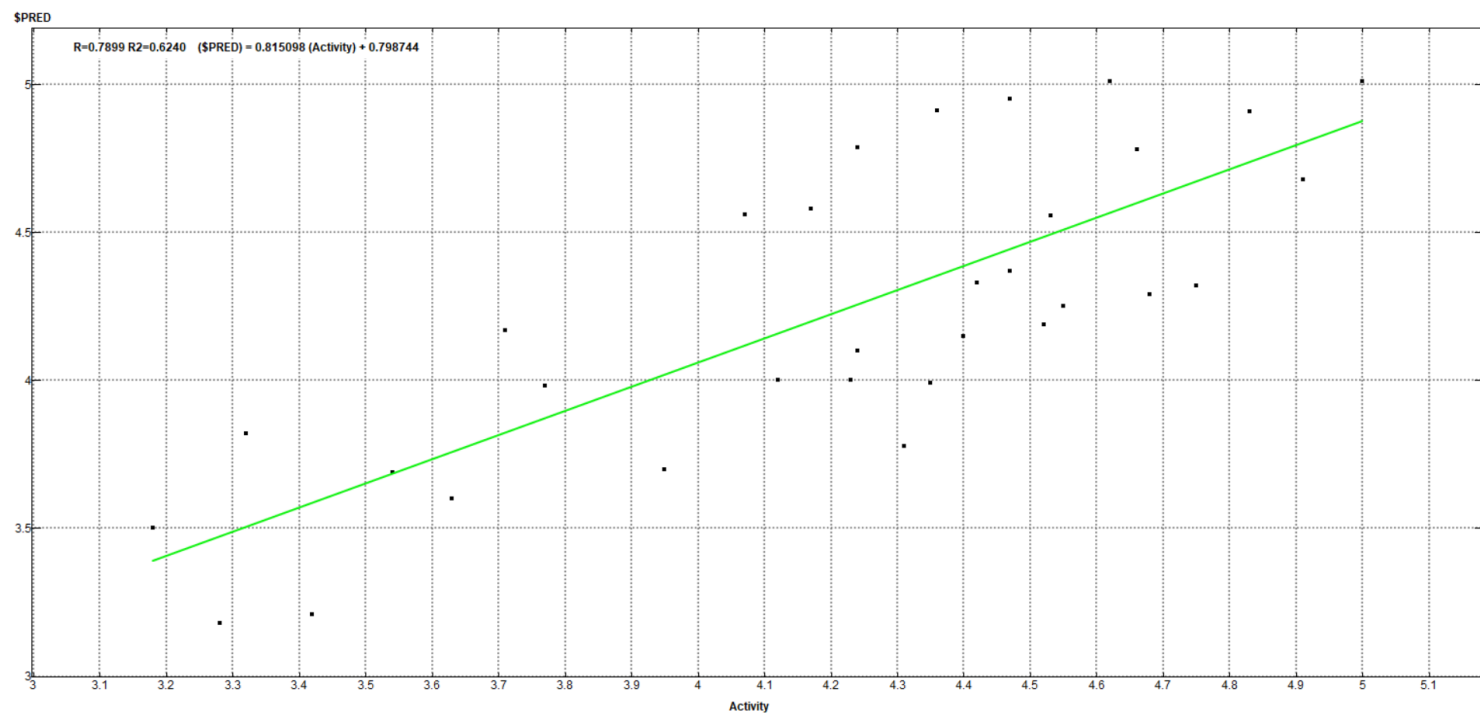

**Figure S4. The correlation between Actual activities (pIC<sub>50</sub>) and Predicted activities (\$PRED) of Test set 2 compounds**
